# Supplementary material for: Multi-spatial scale assessment and multi-dataset fusion of global terrestrial evapotranspiration datasets
Source: Copernicus journal article supplement (doi:10.5194/essd-2024-600), 2025-01-24
Supplement: Supplementary file 1 [file essd-2024-600-supplement.pdf]

*Supporting Information for*

**Multi-spatial scale assessment and multi-dataset fusion of global  
terrestrial evapotranspiration datasets**

**Contents of this file**

Text S1–S6

Figures S1–S25

Tables S1–S5

1 **Text S1. Flux sites and data preprocessing**

2 The ET from FLUXNET has been quality controlled and pre-processed to improve  
3 cross-site consistency and comparability using the harmonised methodology described  
4 in Pastorello et al. (2020). Meteorological data were filled by two independent methods:  
5 marginal distribution sampling (variables with \_F\_MDS suffix) and ERA-Interim  
6 (variables with \_F\_ERA suffix). The final missing-fill product (variables with \_F suffix)  
7 consists of direct measurements and missing-fill records. In this study, latent heat fluxes  
8 were filled using half-hourly (hourly) precipitation (P\_F in mm) and MDS methods  
9 (LE\_F\_MDS in  $W \cdot m^{-2}$ ). Record lengths for each site ranged from 1 to 24 years. For  
10 latent heat fluxes, the data processing steps (screening criteria) were as follows: (1)  
11 First, only data with a continuous coverage of at least 3 years were collected. (2) Data  
12 with negative latent heat fluxes were excluded. (3) Because flux data from nighttime  
13 eddy covariance measurements are missing and have large errors (Mahrt, 1999; Yuan  
14 et al., 2021), the study extracted only daytime latent heat flux data. Daytime is defined  
15 as 7:00 to 19:00 local time (McGloin et al., 2019; Yuan et al., 2021). The study did not  
16 use incident shortwave radiation to define daytime, as nighttime occasionally has larger  
17 values. (4) To avoid high likelihood of dew evaporation (Knauer et al., 2018), the study  
18 excluded data with relative humidity above 95%, as it can strongly affect  
19 evapotranspiration measurements. (5) To avoid intercepted evaporation and sensor  
20 saturation at high relative humidity (Medlyn et al., 2017), data during and up to 6 hours  
21 after rainfall were excluded. (6) To reduce the impact of outliers on half-hourly-scale  
22 data, data below the 5% percentile and above the 95% percentile in latent heat flux were  
23 excluded. Half-hourly evapotranspiration (in mm) was obtained from the latent heat  
24 flux calculations. For precipitation, only (2) and (6) were considered in the data  
25 processing steps. Half-hourly data (precipitation and evapotranspiration) were finally  
26 computed on a monthly scale. In the end, 174 stations were retained.

27

28 **Text S2. Verification of energy balance closure**

29 There are many computational methods for evaluating and analysing energy balance  
30 closure, and in order to be able to comprehensively evaluate the state of energy balance  
31 closure at each flux site, this study used the least-squares linear regression (ordinary  
32 least squares [OLS]) and the energy balance ratio (EBR) methods. The study adjusted  
33 some of the flux data to ensure the quality of the data used in this study. Site energy  
34 closure is a key indicator of flux data quality (Zhu et al., 2016).

35 
$$Res = R_n - H - \lambda E - G \quad (S1)$$

36 where  $R_n$  is the net radiation ( $W \cdot m^{-2}$ ),  $H$  is the sensible heat flux ( $W \cdot m^{-2}$ ),  $\lambda E$  is  
 37 the latent heat flux ( $W \cdot m^{-2}$ ), and  $G$  is the soil heat flux ( $W \cdot m^{-2}$ ). The difference  
 38 between net radiation and soil heat flux is the available energy. In most cases, the  
 39 available energy is greater than the sum of sensible and latent heat. In general, the  
 40 surface energy balance closure (the sum of sensible and latent heat fluxes divided by  
 41 the available energy) is usually in the range of 70% to 90% (Foken et al., 2006).

42  
 43 **Text S3. Water balance method**

44 At the basin scale, changes in precipitation, runoff, ET, and total water storage  
 45 constitute the watershed water balance, and the variables in the water balance can be  
 46 obtained relatively accurately except for ET; therefore, watershed ET is usually  
 47 calculated using the water balance method, and the method is often used as a standard  
 48 method for watershed ET estimation (Xu et al., 2019). Based on the water balance  
 49 principle, the actual evapotranspiration is calculated using the following equation

50 
$$ET = P - R - TWSC \quad (S2)$$

51 where  $P$  represents total precipitation in the basin,  $R$  represents total runoff in the  
 52 basin, and  $TWSC$  represents the change in total water storage. Basin ET values  
 53 obtained based on water balance are often used as reference values to verify the  
 54 accuracy of ET datasets at the basin scale (Senay et al., 2011; Zhang et al., 2010).  
 55 Equation 2 can be used to assess various global ET datasets in a basin but is not  
 56 applicable to the basins where  $R$  is not available.  $TWSC$  should be considered when  
 57 data span less than 10 years, especially for monthly-scale ET assessments. The formula  
 58 for the region is as follows:

59 
$$TWSC(i) = \frac{TWSA(i+1) - TWSA(i-1)}{2\Delta i} \quad (S3)$$

60 Here,  $TWSA$  is the total water storage anomaly, which can be obtained from GRACE  
 61 data (Tapley et al., 2019). When the data spans more than 10 years, it can be ignored.  
 62 Thus, the above equation can be written as  $ET = P - R$ .

63  
 64 **Text S4. Three-cornered hat (TCH) method**

65 The study uses the three-cornered hat (TCH) method to calculate the errors and  
 66 uncertainties of thirty evapotranspiration datasets without any prior knowledge.

67

68 The details of the TCH method are described below. Assuming that there are  $n$   
69 different evapotranspiration datasets  $\{ET_i\}_{i=1,2,\dots,N}$ ,  $i$ , then the  $i^{th}$  ET dataset  $ET_i$   
70 can generally be expressed as

$$71 \quad ET_i = ET_{true} + \varepsilon_i, i = 1, 2, \dots, n \quad (S4)$$

72 Among them,  $ET_{true}$  is the true surface ET, and  $\varepsilon_i$  is the observation error of  $ET_i$ .  
73 Since the real ET value cannot be obtained, any ET dataset is selected as the reference  
74 value, and the difference sequence between the remaining ET datasets and the reference  
75 value is obtained as

$$76 \quad y_i = ET_i - ET_{ref} = \varepsilon_i - \varepsilon_{ref}, i = 1, 2, \dots, n - 1 \quad (S5)$$

77  $ET_{ref}$  is an arbitrarily selected reference ET dataset. The error analysis results of the  
78 TCH method do not depend on the selection of the reference dataset (Ferreira et al.,  
79 2016). The covariance matrix of  $Y$  can be represented by  $S = cov(Y)$ . Introducing the  
80 unknown noise covariance matrix  $R$  ( $R$  is a symmetric matrix), then its relationship  
81 with  $S$  is

$$82 \quad S = J \cdot R \cdot J^T \quad (S6)$$

83 where  $J$  is represented as

$$84 \quad J_{n-1,n} = \begin{bmatrix} 1 & 1 & \dots & 0 & -1 \\ 0 & 0 & \dots & 0 & -1 \\ \vdots & \vdots & \ddots & \vdots & \vdots \\ 0 & 0 & 0 & \dots & -1 \end{bmatrix} \quad (S7)$$

85 Matrix  $R$  is defined as

$$86 \quad R = \begin{bmatrix} \sigma_{11} & \sigma_{12} & \dots & \sigma_{1n} \\ \sigma_{12} & \sigma_{22} & \dots & \sigma_{21} \\ \vdots & \vdots & \ddots & \vdots \\ \sigma_{1n} & \sigma_{21} & \dots & \sigma_{nn} \end{bmatrix} \quad (S8)$$

87 Among these,  $\sigma_{ii} = cov(\varepsilon_i, \varepsilon_j)$ , ( $i, j = 1, 2, \dots, n$ ), is the covariance of time series  $\varepsilon_i$   
88 and  $\varepsilon_j$ . However, Eq. (8) cannot be solved as the number of unknown elements is larger  
89 than the number of equations. Therefore, the remaining parameters require a reasonable  
90 approach to obtain a unique value. Galindo and Palacio (1999) proposed a method  
91 based on Kuhn-Tucker theory, and the objective function is given below:



92 
$$F_{(\sigma_{1n}, \dots, \sigma_{nn})} = \frac{1}{K^2} \sum_{i < j}^n (\sigma_{ij})^2 \quad (\text{S9})$$

93 Here,  $K = \sqrt[N-1]{\det(S)}$ . The constraint  $H$  is

94 
$$H_{(\sigma_{1n}, \dots, \sigma_{nn})} = -\frac{|Q|}{|S| \cdot K} < 0 \quad (\text{S10})$$

95  $Q$  is a diagonal matrix, and the elements on its diagonal are  $\sigma_{11}, \sigma_{22}, \dots, \sigma_{nn}$ . The  
 96 square root of the  $Q$  diagonal values are considered to be the uncertainty of evaluated  
 97 ET. The ratio of the uncertainty to the time series mean value is the relative uncertainty.

98

99 **Text S5. Bayesian model average (BMA) fusion scheme**

100 Bayesian model averaging (BMA) has recently been proposed as a statistical method  
 101 to calibrate forecast ensembles from numerical weather models. Successful  
 102 implementation of BMA, however, requires accurate estimates of the weights and  
 103 variances of the individual competing models in the ensemble. In this study, we use the  
 104 DiffeRential Evolution Adaptive Metropolis (DREAM) Markov Chain Monte Carlo  
 105 (MCMC) algorithm for estimating the BMA weights and variances (Vrugt et al., 2008).  
 106 The formulas are described in detail in Vrugt et al. (2008).

107

108 **Text S6. Weighting scheme for ET dataset fusion**

109 Analysis was performed based on the grid scale of each ET dataset. Among these  
 110 datasets, 1982–2011 are the common coverage years for all ET datasets, and their  
 111 weights are calculated as detailed in section 2.2 of the main text. As for the non-  
 112 common coverage years 1980–1981 and 2012–2020, the weights for each year are  
 113 obtained by filtering all ET datasets covering that year for BMA analyses to obtain the  
 114 corresponding weights (see Figure S3). For example, there are a total of 27 ET datasets  
 115 covering the year 1980, and the weights obtained from the BMA analysis based on these  
 116 27 ET datasets are used as the weights of these 27 datasets in 1980; there are a total of  
 117 19 ET datasets covering the year 2019, and the weights obtained from the BMA analysis  
 118 based on these 19 ET datasets are used as the weights of these 19 datasets in 2019.

119

120 References

- 121 Ferreira, V. G., Montecino, H. D. C., Yakubu, C. I., and Heck, B.: Uncertainties of the  
122 Gravity Recovery and Climate Experiment time-variable gravity-field solutions  
123 based on three-cornered hat method, *JARS*, 10, 015015,  
124 <https://doi.org/10.1117/1.JRS.10.015015>, 2016.
- 125 Foken, T., Wimmer, F., Mauder, M., Thomas, C., and Liebethal, C.: Some aspects of  
126 the energy balance closure problem, *Atmospheric Chemistry and Physics*, 6,  
127 4395–4402, <https://doi.org/10.5194/acp-6-4395-2006>, 2006.
- 128 Galindo, F. J. and Palacio, J.: Estimating the Instabilities of N Correlated Clocks, in:  
129 Proceedings of the 31th Annual Precise Time and Time Interval Systems and  
130 Applications Meeting, Proceedings of the 31th Annual Precise Time and Time  
131 Interval Systems and Applications Meeting, 285–296, 1999.
- 132 Knauer, J., Zaehle, S., Medlyn, B. E., Reichstein, M., Williams, C. A., Migliavacca, M.,  
133 De Kauwe, M. G., Werner, C., Keitel, C., Kolari, P., Limousin, J.-M., and  
134 Linderson, M.-L.: Towards physiologically meaningful water-use efficiency  
135 estimates from eddy covariance data, *Global Change Biology*, 24, 694–710,  
136 <https://doi.org/10.1111/gcb.13893>, 2018.
- 137 Mahrt, L.: Stratified Atmospheric Boundary Layers, *Boundary-Layer Meteorology*, 90,  
138 375–396, <https://doi.org/10.1023/A:1001765727956>, 1999.
- 139 McGloin, R., Šigut, L., Fischer, M., Foltýnová, L., Chawla, S., Trnka, M., Pavelka, M.,  
140 and Marek, M. V.: Available Energy Partitioning During Drought at Two Norway  
141 Spruce Forests and a European Beech Forest in Central Europe, *Journal of*  
142 *Geophysical Research: Atmospheres*, 124, 3726–3742,  
143 <https://doi.org/10.1029/2018JD029490>, 2019.
- 144 Medlyn, B. E., De Kauwe, M. G., Lin, Y.-S., Knauer, J., Duursma, R. A., Williams, C.  
145 A., Arneth, A., Clement, R., Isaac, P., Limousin, J.-M., Linderson, M.-L., Meir, P.,  
146 Martin-StPaul, N., and Wingate, L.: How do leaf and ecosystem measures of  
147 water-use efficiency compare?, *New Phytologist*, 216, 758–770,  
148 <https://doi.org/10.1111/nph.14626>, 2017.
- 149 Pastorello, G., Trotta, C., Canfora, E., Chu, H., Christianson, D., Cheah, Y.-W.,  
150 Poindexter, C., Chen, J., Elbashandy, A., Humphrey, M., Isaac, P., Polidori, D.,  
151 Reichstein, M., Ribeca, A., van Ingen, C., Vuichard, N., Zhang, L., Amiro, B.,  
152 Ammann, C., Arain, M. A., Ardö, J., Arkebauer, T., Arndt, S. K., Arriga, N.,  
153 Aubinet, M., Aurela, M., Baldocchi, D., Barr, A., Beamesderfer, E., Marchesini, L.

154 B., Bergeron, O., Beringer, J., Bernhofer, C., Berveiller, D., Billesbach, D., Black,  
155 T. A., Blanken, P. D., Bohrer, G., Boike, J., Bolstad, P. V., Bonal, D., Bonnefond,  
156 J.-M., Bowling, D. R., Bracho, R., Brodeur, J., Brümmer, C., Buchmann, N.,  
157 Burban, B., Burns, S. P., Buysse, P., Cale, P., Cavagna, M., Cellier, P., Chen, S.,  
158 Chini, I., Christensen, T. R., Cleverly, J., Collalti, A., Consalvo, C., Cook, B. D.,  
159 Cook, D., Coursolle, C., Cremonese, E., Curtis, P. S., D'Andrea, E., da Rocha, H.,  
160 Dai, X., Davis, K. J., Cinti, B. D., Grandcourt, A. de, Ligne, A. D., De Oliveira, R.  
161 C., Delpierre, N., Desai, A. R., Di Bella, C. M., Tommasi, P. di, Dolman, H.,  
162 Domingo, F., Dong, G., Dore, S., Duce, P., Dufrêne, E., Dunn, A., Dušek, J.,  
163 Eamus, D., Eichelmann, U., ElKhidir, H. A. M., Eugster, W., Ewenz, C. M., Ewers,  
164 B., Famulari, D., Fares, S., Feigenwinter, I., Feitz, A., Fensholt, R., Filippa, G.,  
165 Fischer, M., Frank, J., Galvagno, M., et al.: The FLUXNET2015 dataset and the  
166 ONEFlux processing pipeline for eddy covariance data, *Sci Data*, 7, 225,  
167 <https://doi.org/10.1038/s41597-020-0534-3>, 2020.

168 Senay, G. B., Leake, S., Nagler, P. L., Artan, G., Dickinson, J., Cordova, J. T., and Glenn,  
169 E. P.: Estimating basin scale evapotranspiration (ET) by water balance and remote  
170 sensing methods, *Hydrological Processes*, 25, 4037–4049,  
171 <https://doi.org/10.1002/hyp.8379>, 2011.

172 Tapley, B. D., Watkins, M. M., Flechtner, F., Reigber, C., Bettadpur, S., Rodell, M.,  
173 Sasgen, I., Famiglietti, J. S., Landerer, F. W., Chambers, D. P., Reager, J. T.,  
174 Gardner, A. S., Save, H., Ivins, E. R., Swenson, S. C., Boening, C., Dahle, C.,  
175 Wiese, D. N., Dobslaw, H., Tamisiea, M. E., and Velicogna, I.: Contributions of  
176 GRACE to understanding climate change, *Nat. Clim. Chang.*, 9, 358–369,  
177 <https://doi.org/10.1038/s41558-019-0456-2>, 2019.

178 Vrugt, J. A., Diks, C. G. H., and Clark, M. P.: Ensemble Bayesian model averaging  
179 using Markov Chain Monte Carlo sampling, *Environ Fluid Mech*, 8, 579–595,  
180 <https://doi.org/10.1007/s10652-008-9106-3>, 2008.

181 Xu, T., Guo, Z., Xia, Y., Ferreira, V. G., Liu, S., Wang, K., Yao, Y., Zhang, X., and Zhao,  
182 C.: Evaluation of twelve evapotranspiration products from machine learning,  
183 remote sensing and land surface models over conterminous United States, *Journal*  
184 *of Hydrology*, 578, 124105, <https://doi.org/10.1016/j.jhydrol.2019.124105>, 2019.

185 Yuan, K., Zhu, Q., Zheng, S., Zhao, L., Chen, M., Riley, W. J., Cai, X., Ma, H., Li, F.,  
186 Wu, H., and Chen, L.: Deforestation reshapes land-surface energy-flux  
187 partitioning, *Environ. Res. Lett.*, 16, 024014, [7](https://doi.org/10.1088/1748-</a></p></div><div data-bbox=)

188 9326/abd8f9, 2021.

189 Zhang, K., Kimball, J. S., Nemani, R. R., and Running, S. W.: A continuous satellite-  
190 derived global record of land surface evapotranspiration from 1983 to 2006, *Water*  
191 *Resources Research*, 46, <https://doi.org/10.1029/2009WR008800>, 2010.

192 Zhu, G., Zhang, K., Li, X., Liu, S.-M., Ding, Z.-Y., Ma, J.-Z., Huang, C.-L., Han, T.,  
193 and He, J.-H.: Evaluating the complementary relationship for estimating  
194 evapotranspiration using the multi-site data across north China, *Agricultural and*  
195 *Forest Meteorology*, 230–231, 33–44,  
196 <https://doi.org/10.1016/j.agrformet.2016.06.006>, 2016.

197

198

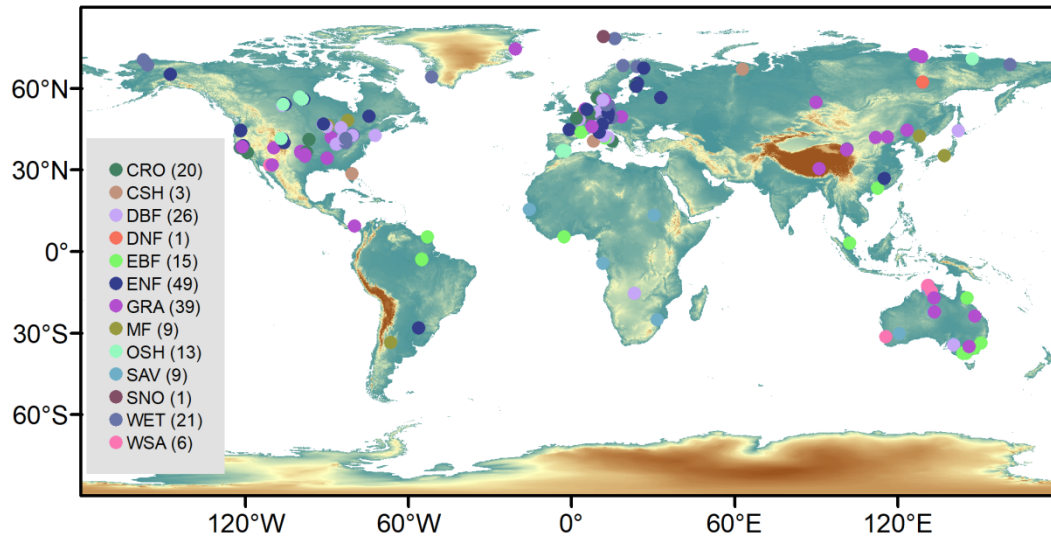

199

200 **Fig. S1:** Global spatial distribution of the 212 ET from FLUXNET and their  
 201 corresponding vegetation types. Numbers in parentheses indicate the number of sites  
 202 for each vegetation type (identified in Table S2).

203

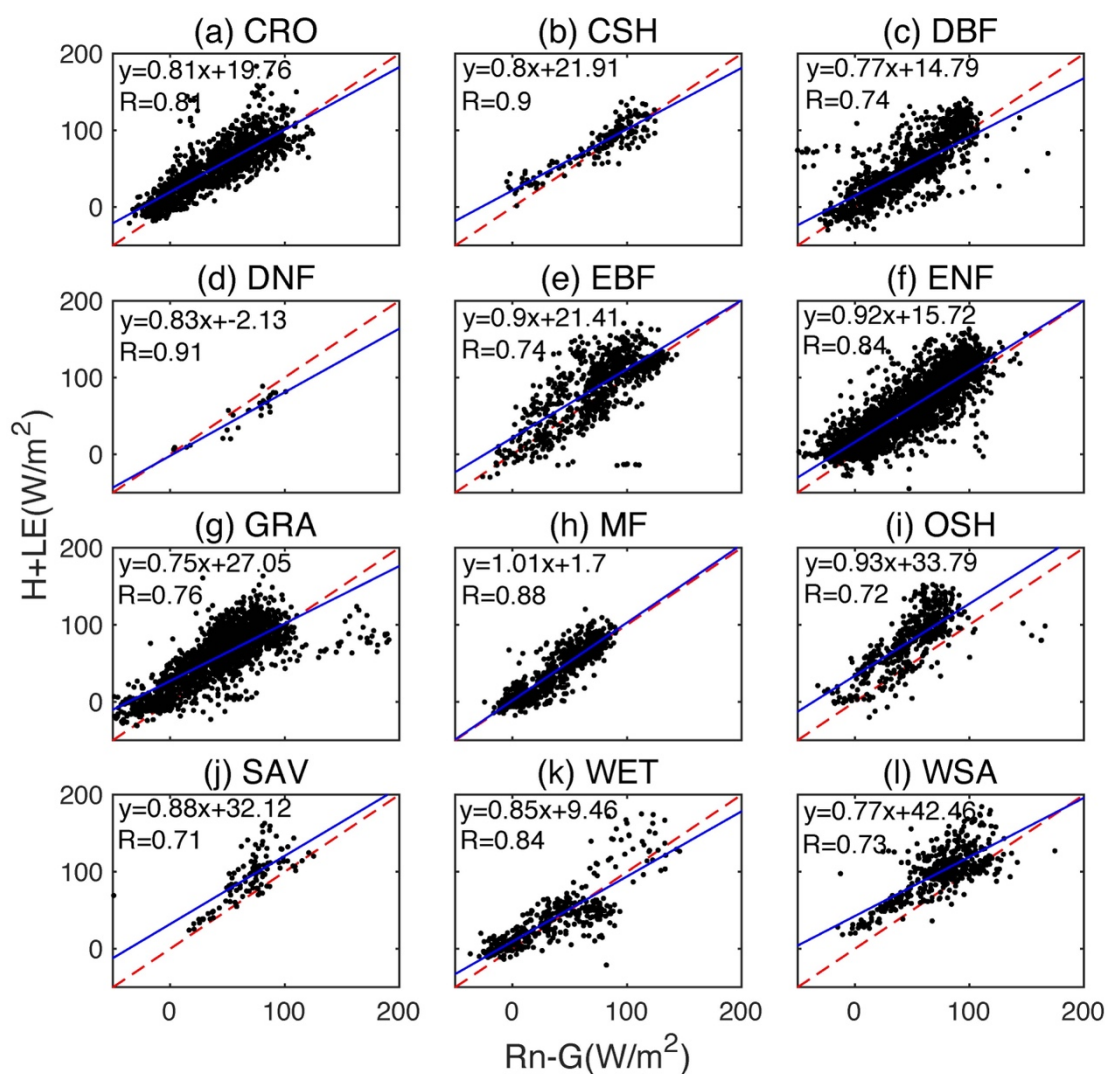

205

206 **Fig. S2:** Least-squares linear-regression-based energy balance closed scatter fit for  
 207 monthly-scale flux tower data.

208

209

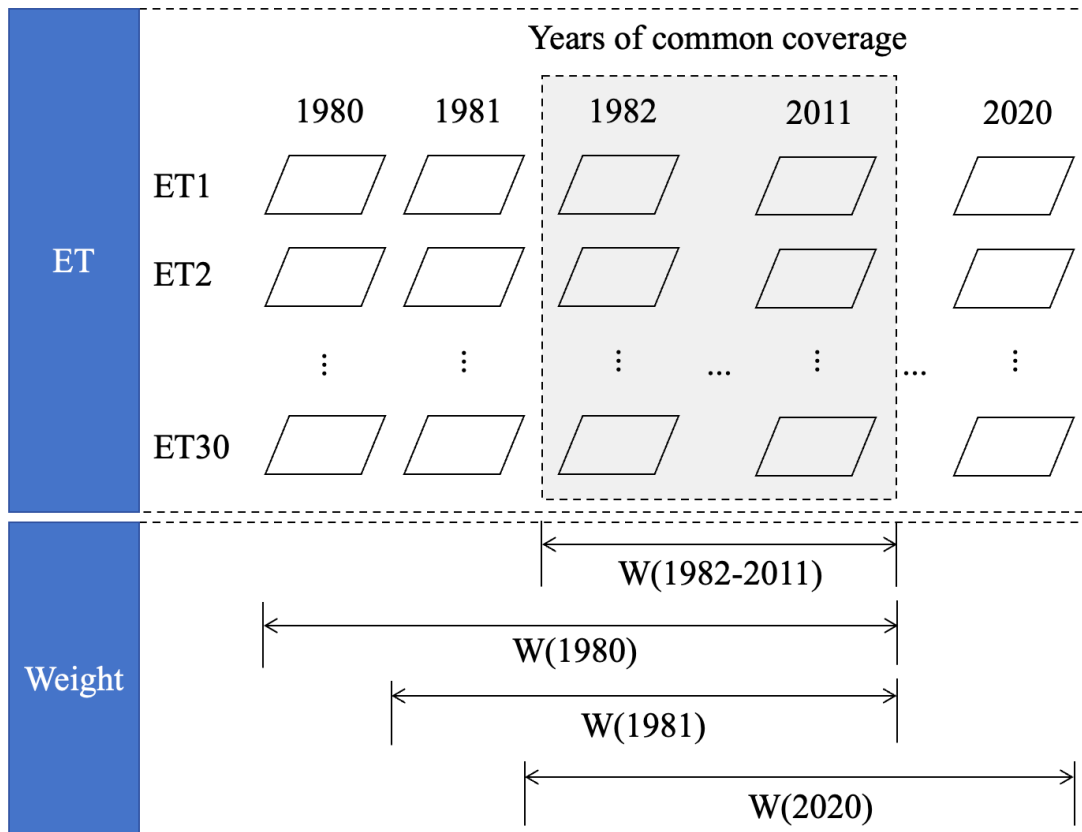

211

212 **Fig. S3:** Weighting scheme for ET datasets during non-common coverage years.

213

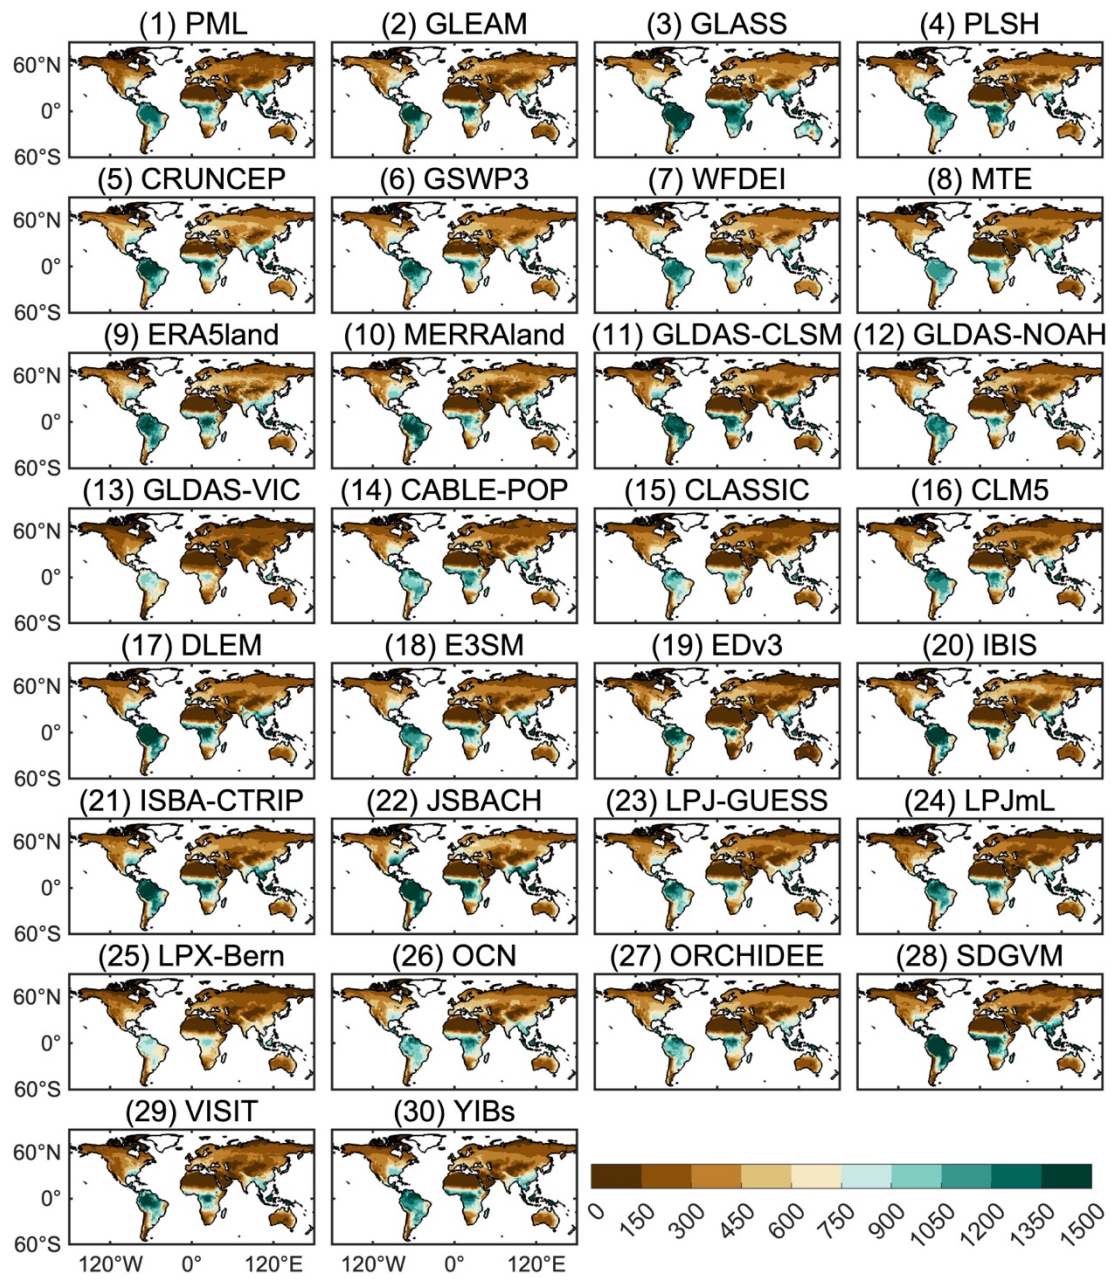

215

216 **Fig. S4:** Multi-year average evapotranspiration during 1982–2011 (unit: mm).

217



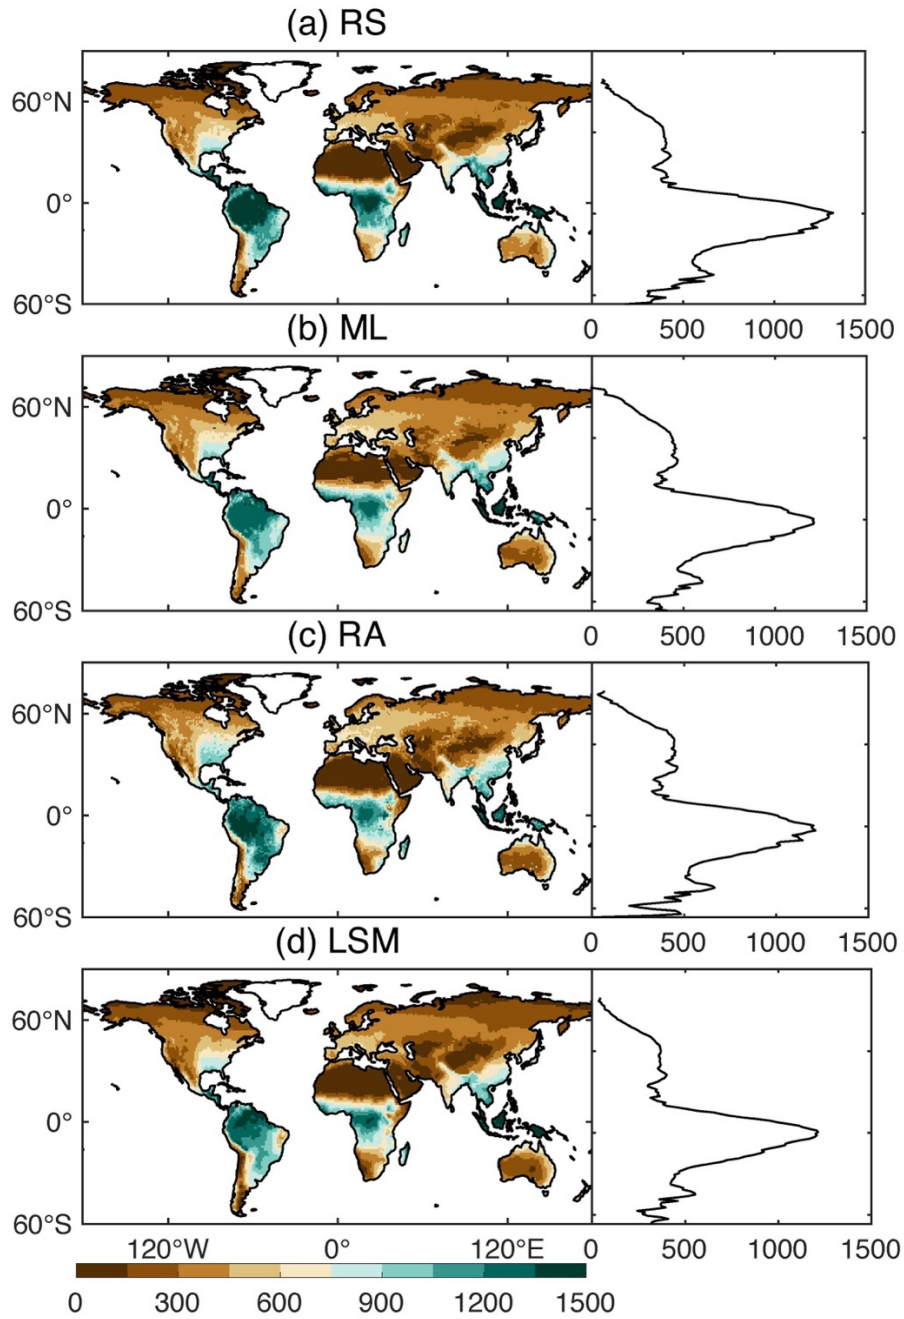

218

219 **Fig. S5:** Multi-year average evapotranspiration of multi-dataset median for four types  
 220 of evapotranspiration datasets during 1982–2011 (unit: mm).

221

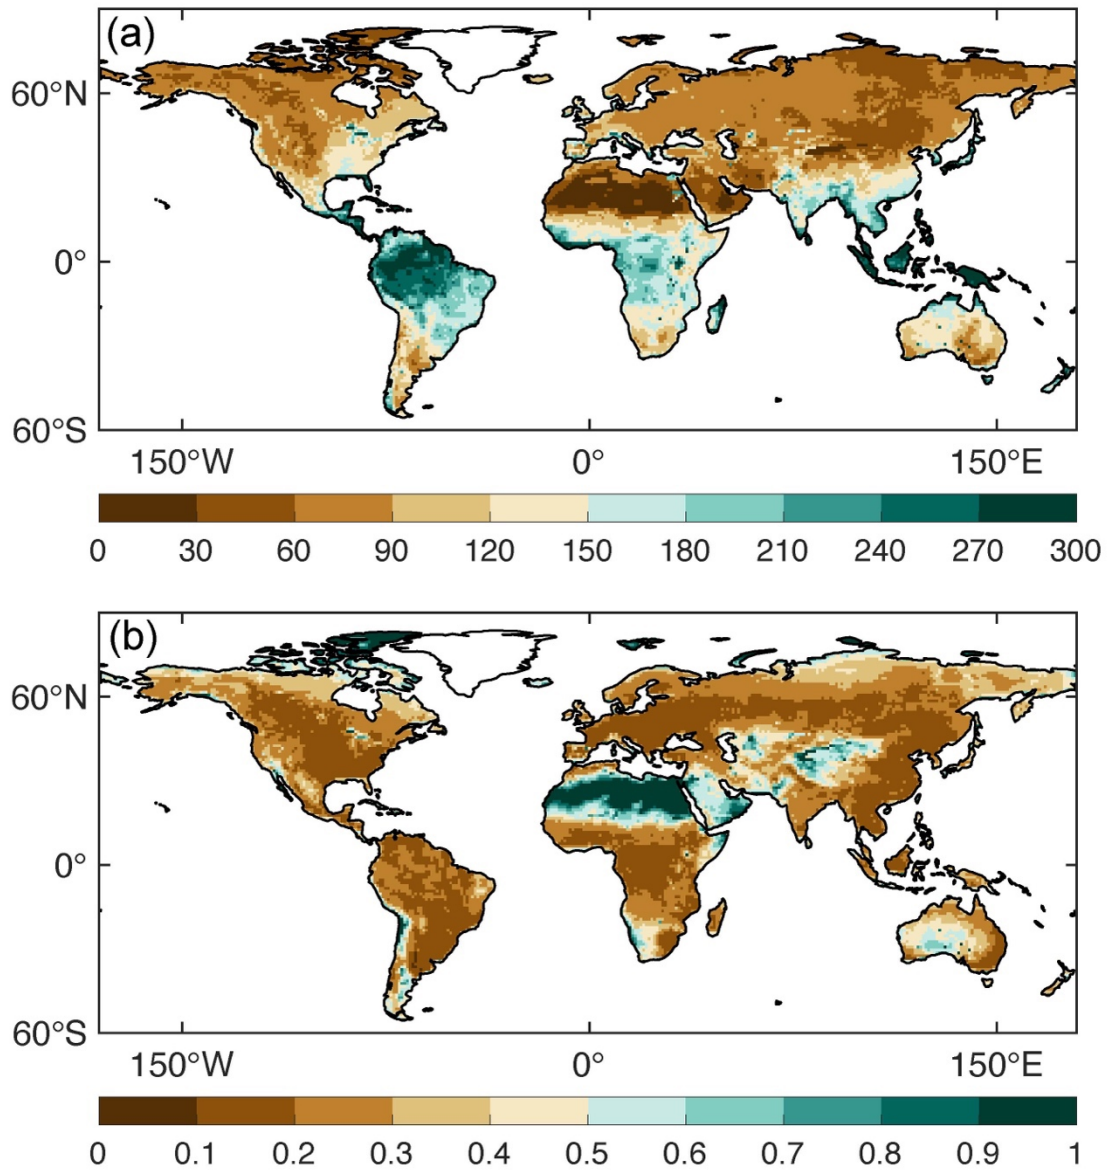

222

223 **Fig. S6:** (a) Standard deviation (STD) and (b) standardized standard deviation of 30 ET

224 datasets at the multi-year average scale (unit: mm).

225

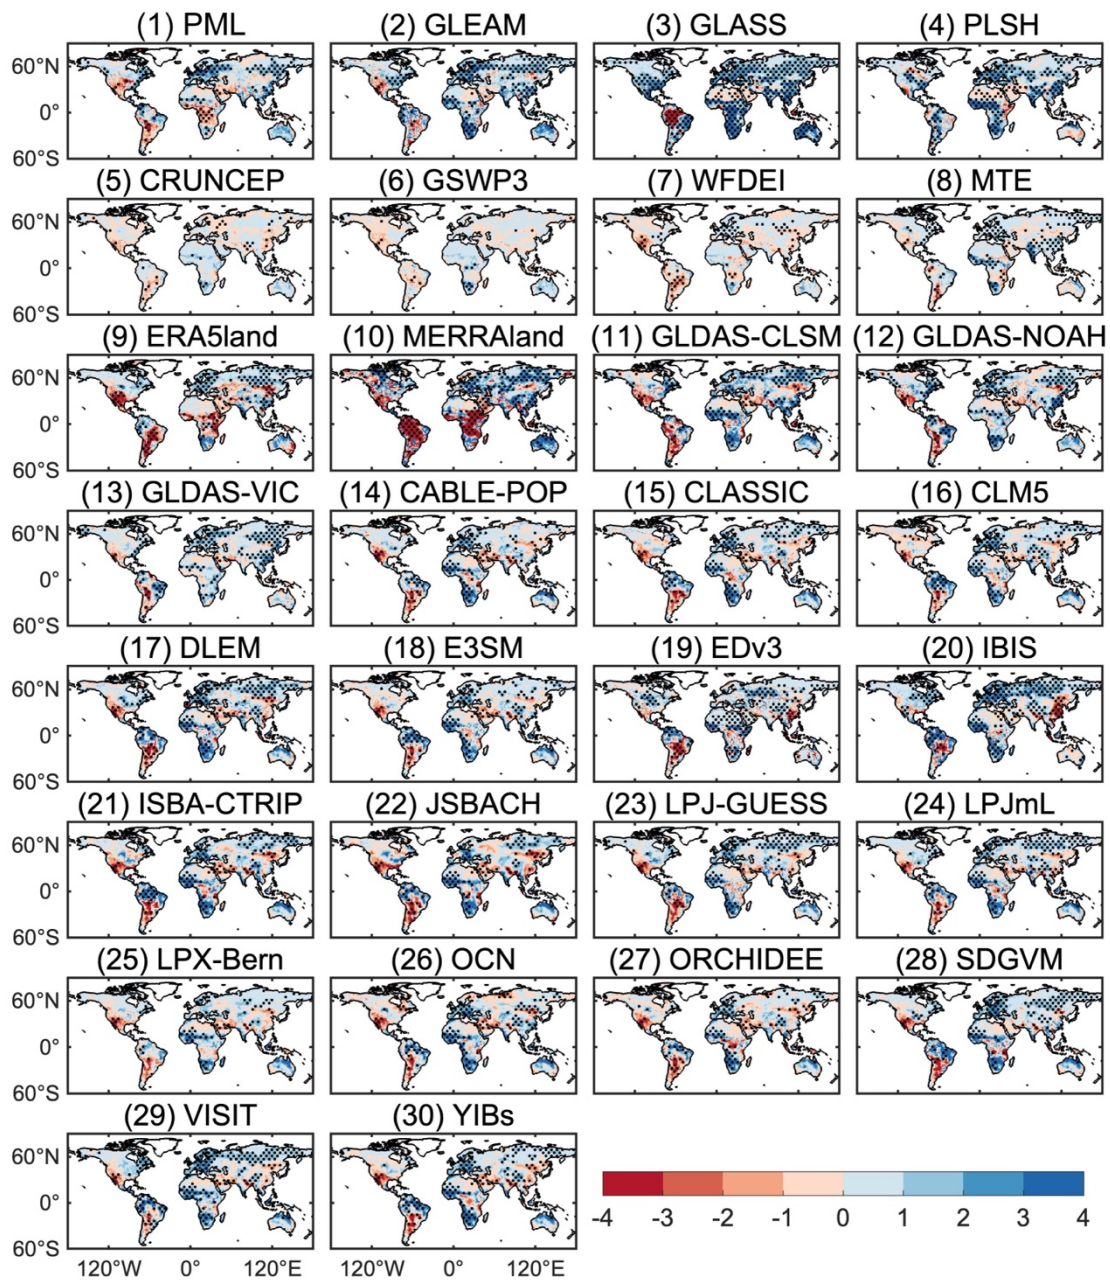

227

228 **Fig. S7:** Interannual trends in evapotranspiration datasets during 1982–2011 (unit:  
 229  $\text{mm}\cdot\text{yr}^{-1}$ ) (the black dotted areas indicate that the trend in these grid points was  
 230 significant at the 95% level).

231



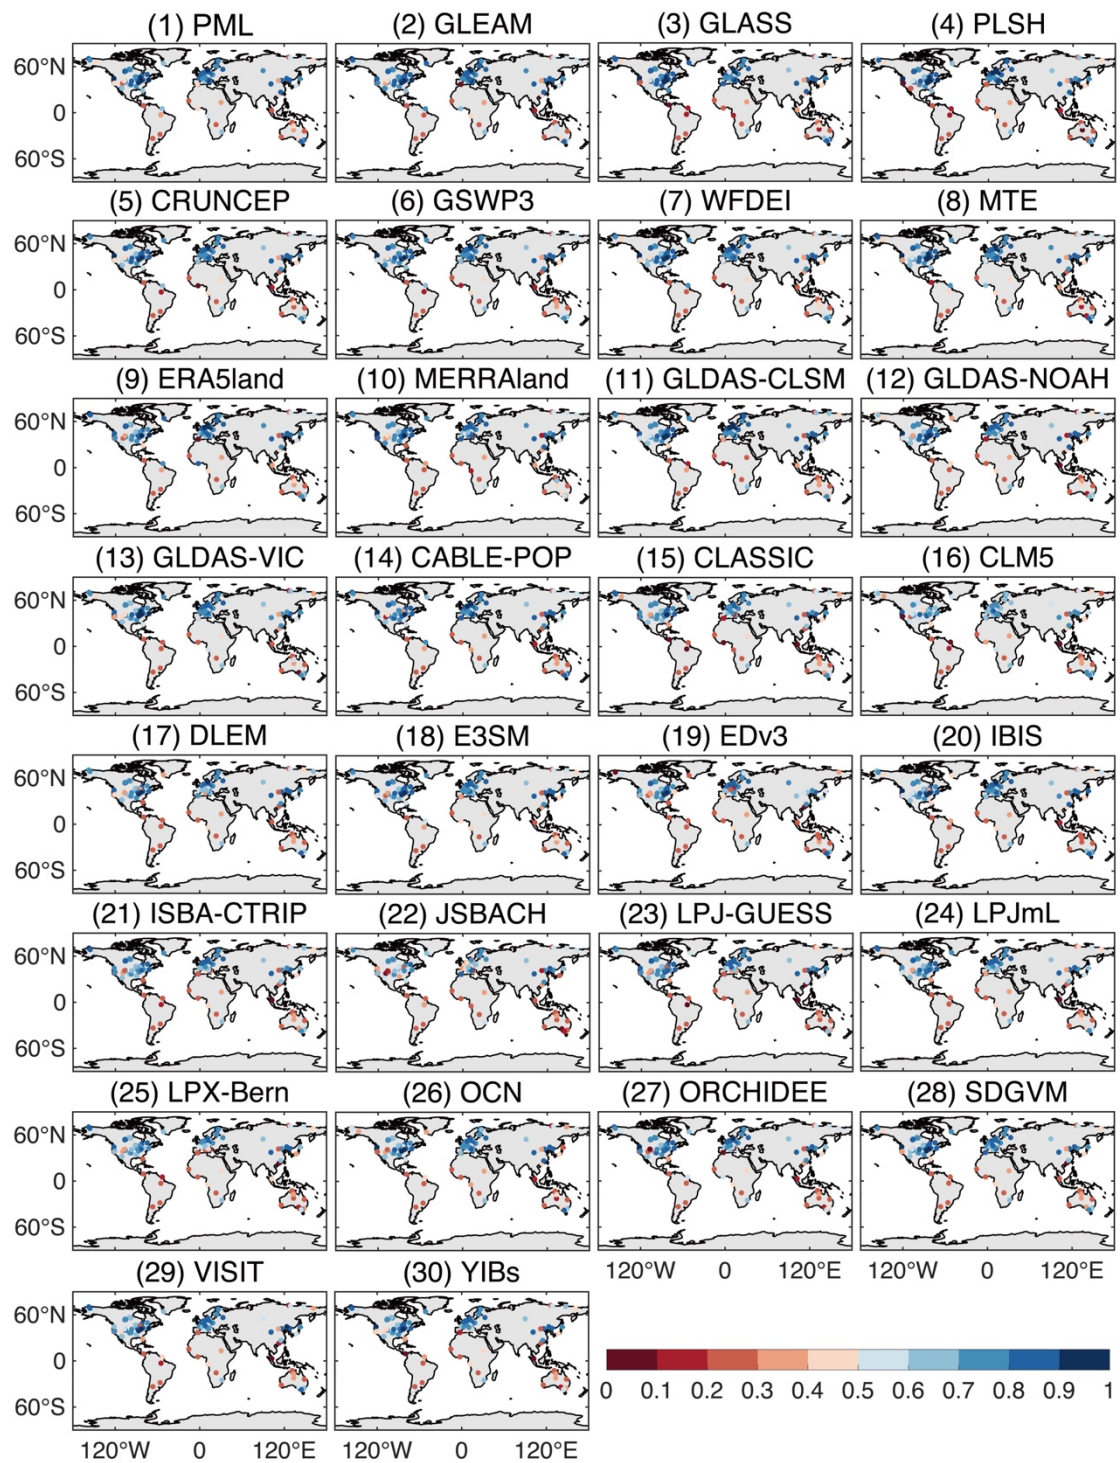

232

233 **Fig. S8:** Spatial distribution of correlation coefficients ( $R$ ) for site validation of each  
 234 ET dataset during 1991–2011.

235

236

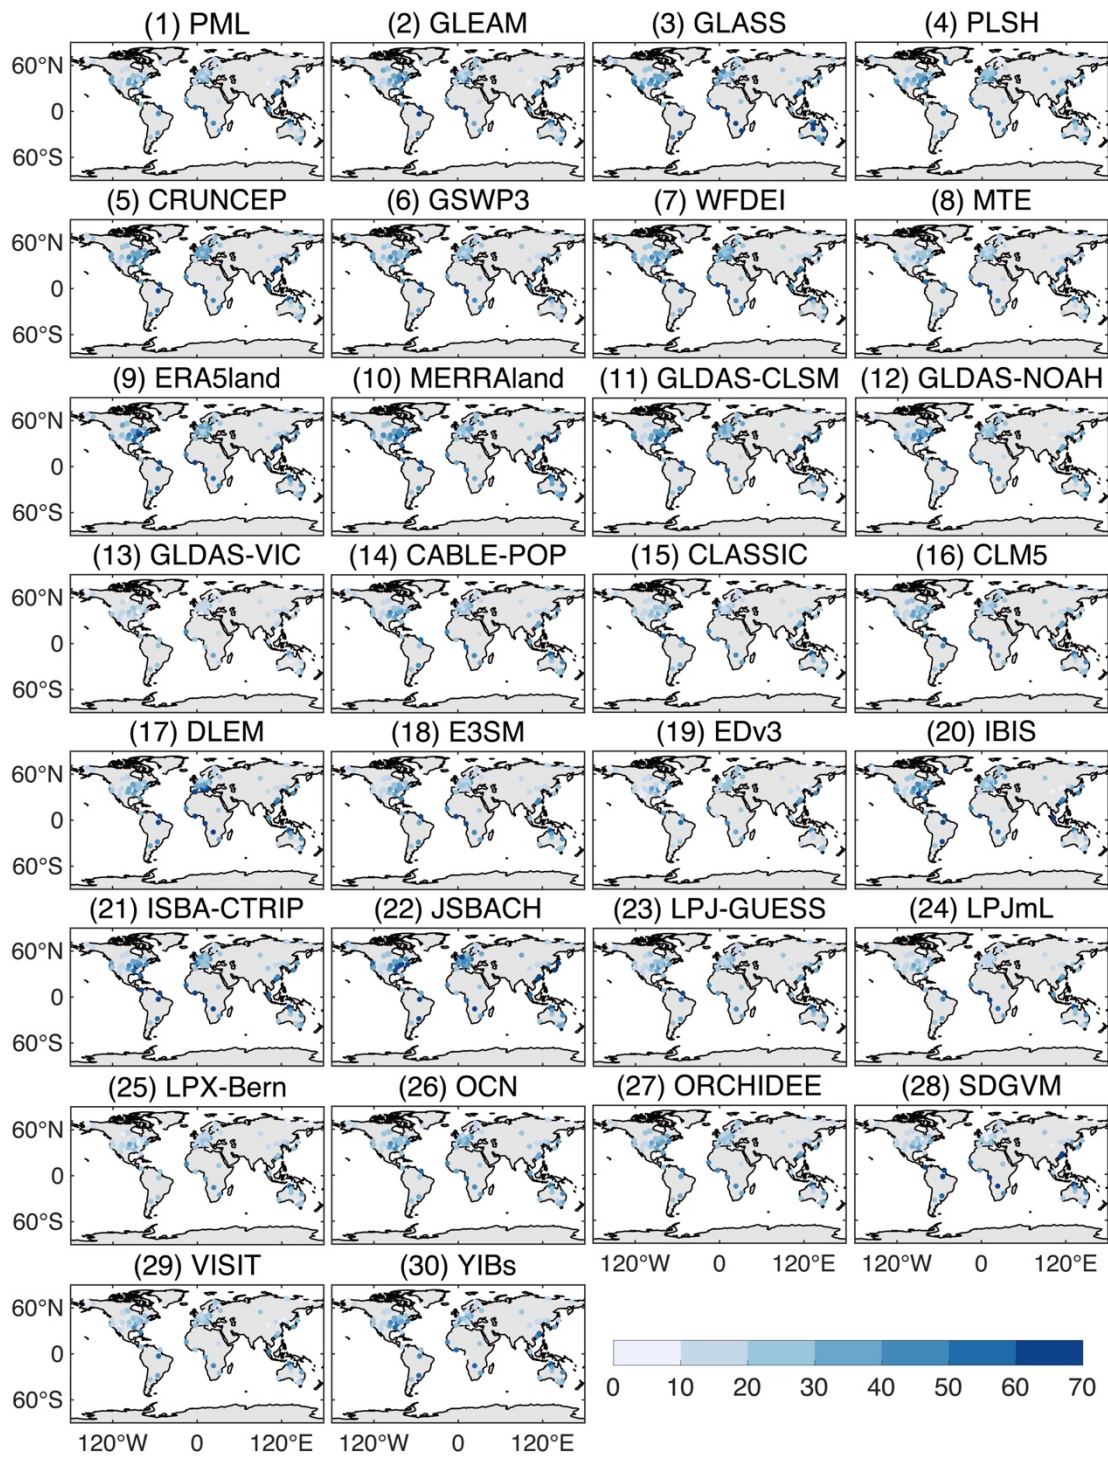

238

239 **Fig. S9:** Spatial distribution of mean absolute errors (MAE) for site validation of each  
 240 ET dataset during 1991–2011.

241



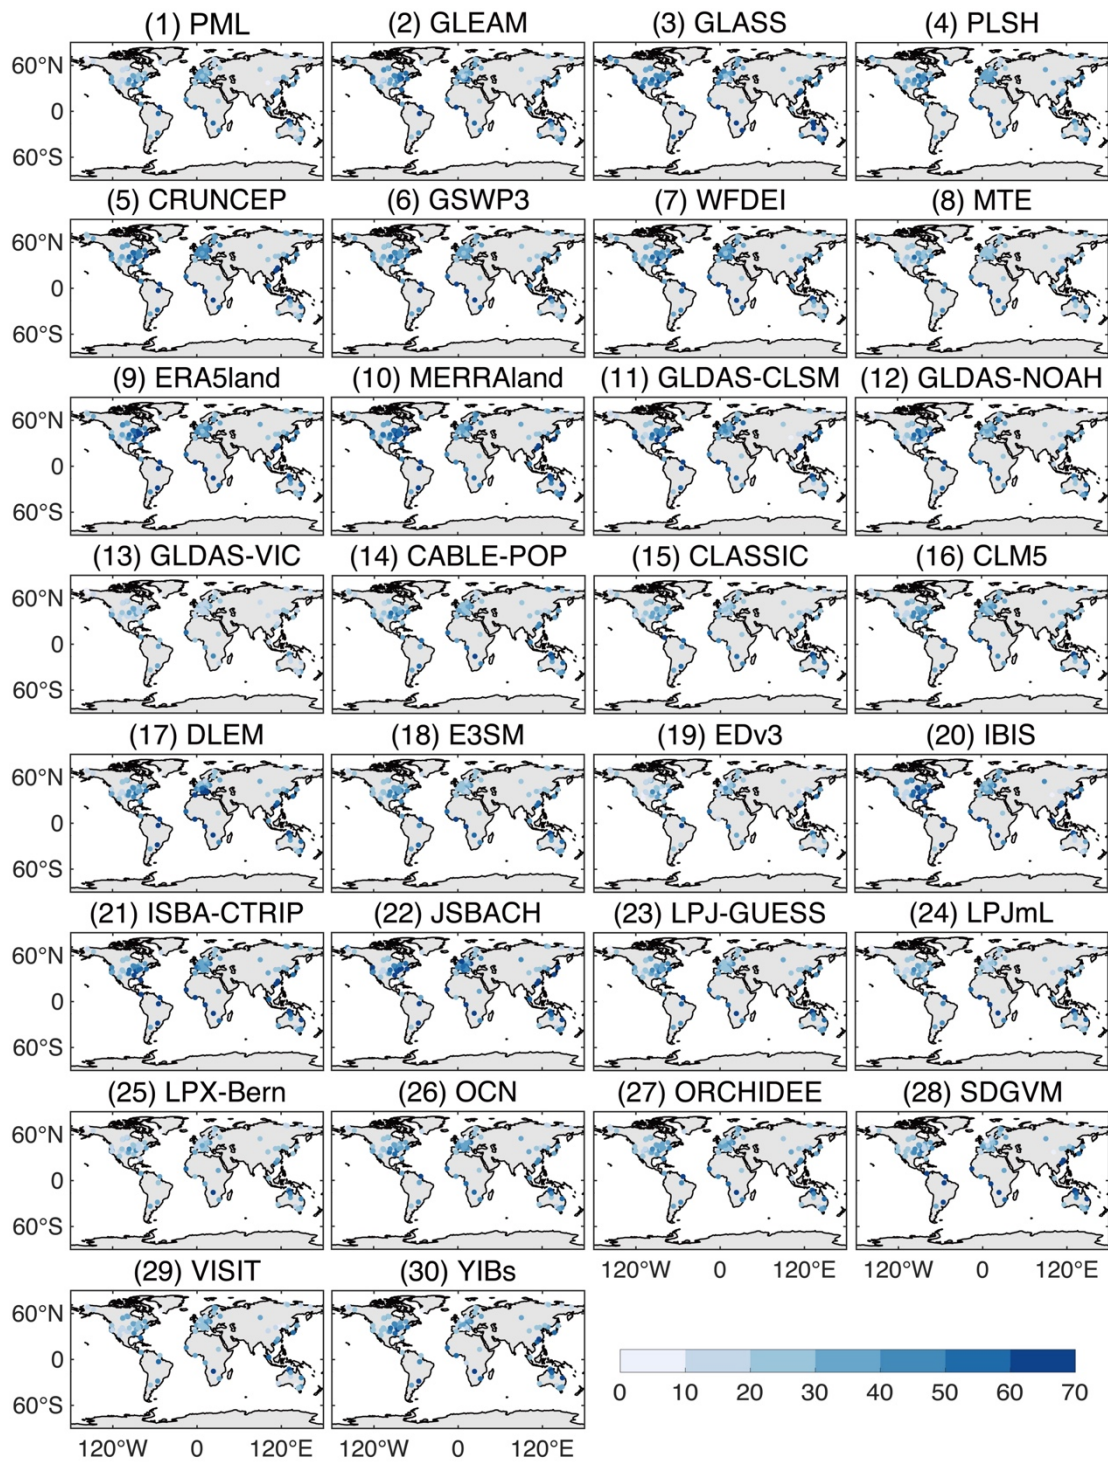

243

244 **Fig. S10:** Spatial distribution of root-mean-square errors (RMSE) for site validation of  
 245 each ET dataset during 1991–2011.

246

247

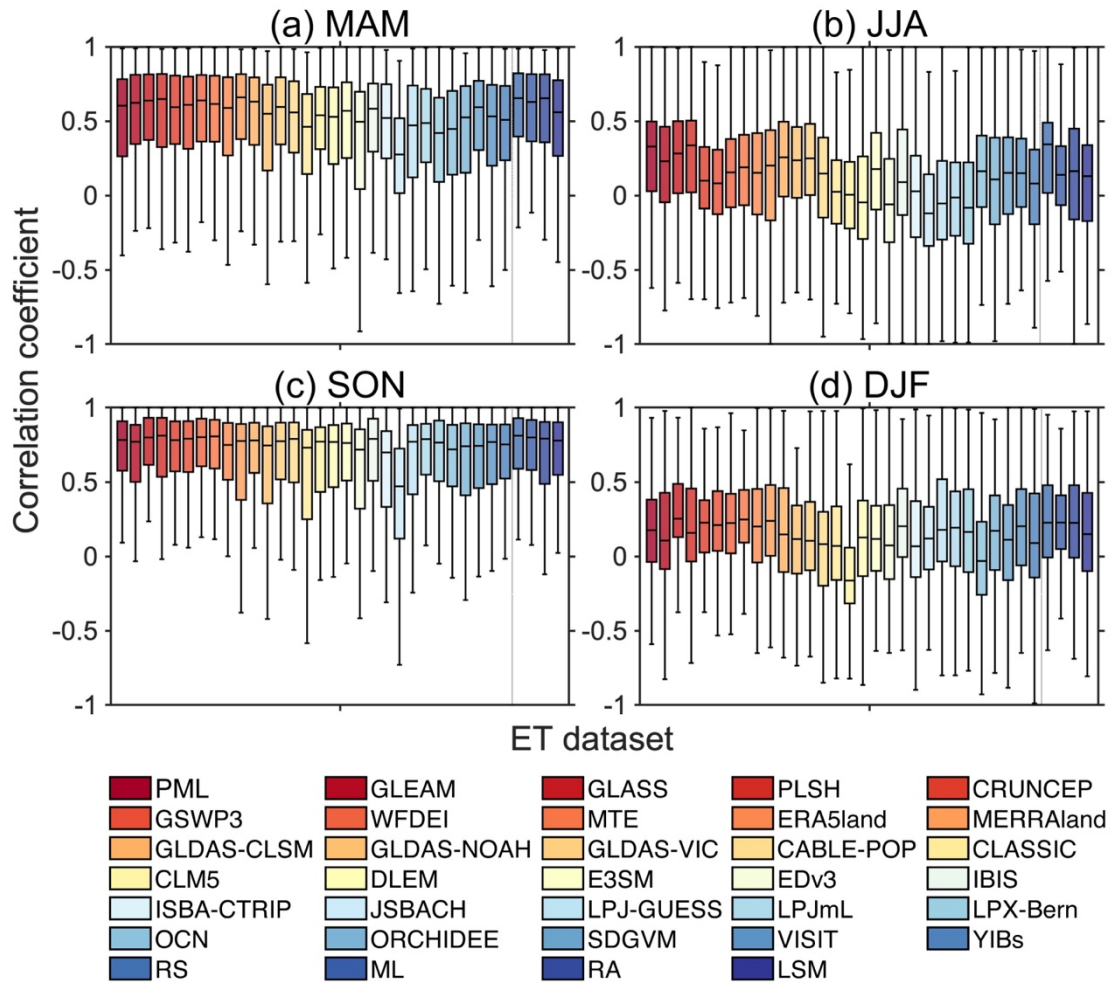

249

250 **Fig. S11:** Spatial distribution of seasonal correlation coefficients ( $R$ ), validated at each  
 251 ET dataset site, 1991–2011. Each box-and-whisker plot represents the range of  
 252 uncertainty across sites for that scenario (for each box, the central horizontal line  
 253 represents the median of the sample, the upper and lower boundaries represent the 75th  
 254 and 25th percentile values, respectively, and the two ‘whiskers’ extend to the maximum  
 255 and minimum values that are not considered outliers, which are plotted separately).

256

257

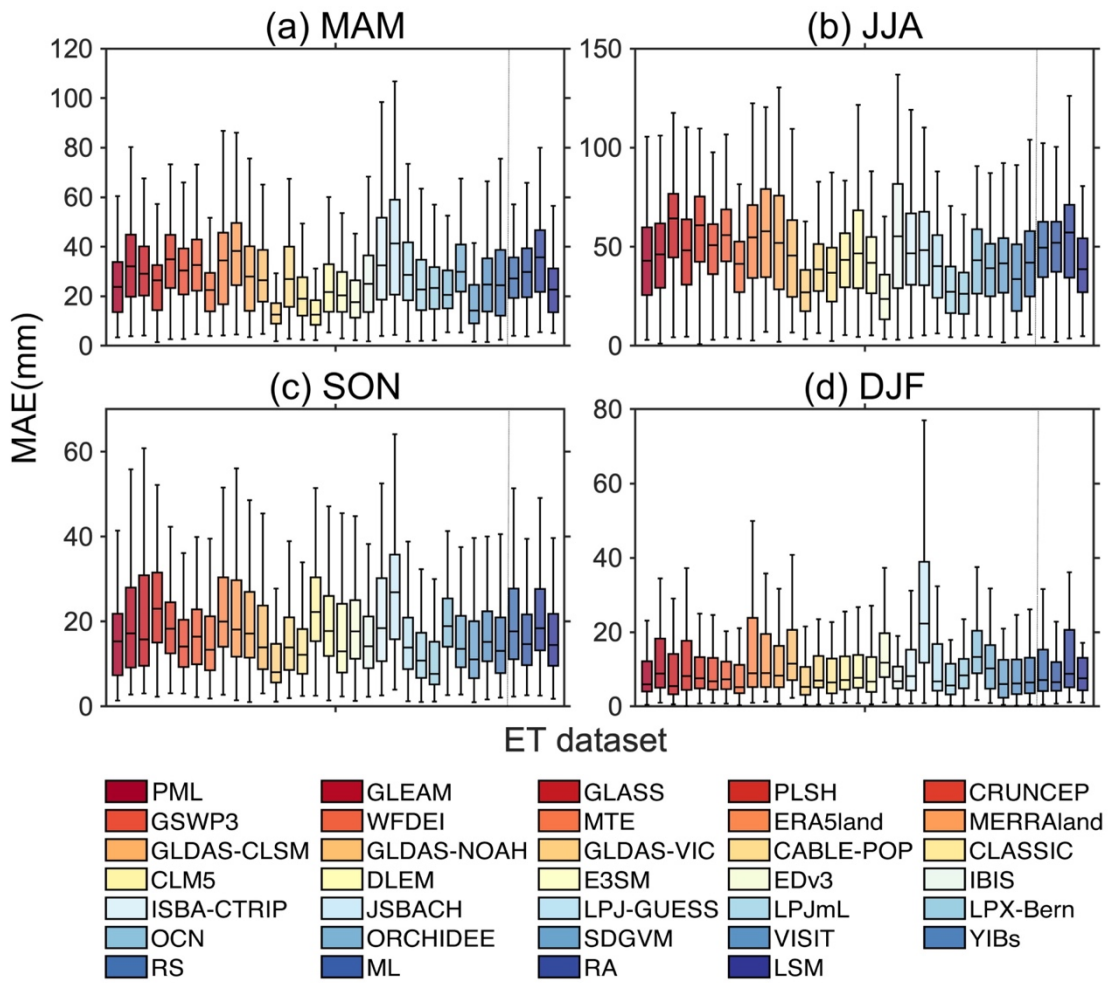

259

260 **Fig. S12:** Spatial distribution of seasonal mean absolute errors (MAE) in the validation  
 261 of each ET dataset site, 1991–2011. Each box-and-whisker plot represents the range of  
 262 uncertainty across sites for that scenario (for each box, the central horizontal line  
 263 represents the median of the sample, the upper and lower boundaries represent the 75th  
 264 and 25th percentile values, respectively, and the two ‘whiskers’ extend to the maximum  
 265 and minimum values that are not considered outliers, which are plotted separately).

266

267



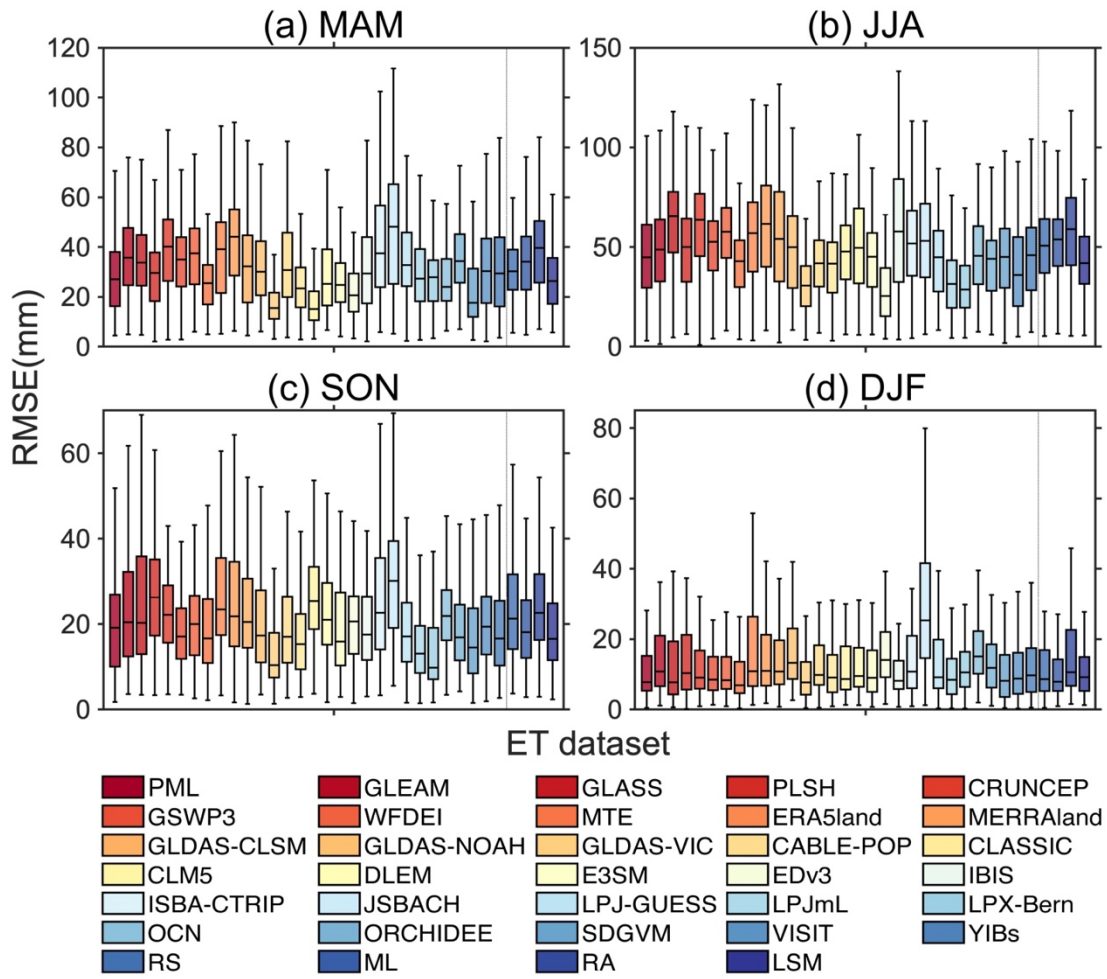

269

270 **Fig. S13:** Spatial distribution of seasonal root-mean-square errors (RMSE) validated at  
 271 each ET dataset site for 1991–2011. Each box-and-whisker plot represents the range of  
 272 uncertainty across sites for that scenario (for each box, the central horizontal line  
 273 represents the median of the sample, the upper and lower boundaries represent the 75th  
 274 and 25th percentile values, respectively, and the two ‘whiskers’ extend to the maximum  
 275 and minimum values that are not considered outliers, which are plotted separately).

276

277

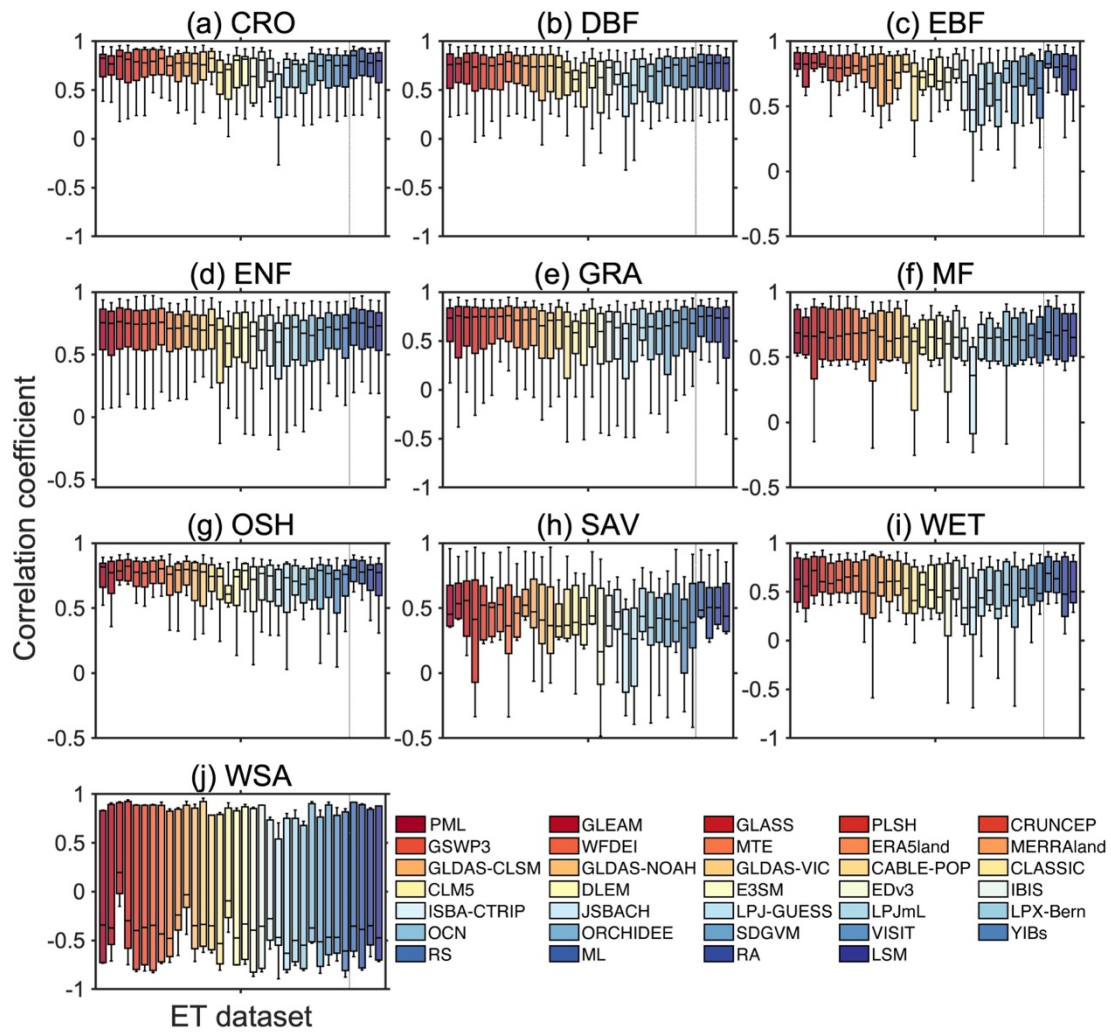

278

279 **Fig. S14:** Correlation coefficients ( $R$ ) between each ET dataset and ET from FLUXNET  
 280 for different vegetation types, 1991–2011. Each box-and-whisker plot indicates the  
 281 range of uncertainty for the different sites in the scenario (for each box, the central  
 282 horizontal line indicates the median of the sample, its upper and lower boundaries  
 283 indicate the 75th and 25th percentile values, respectively, and the two ‘whiskers’ extend  
 284 to the maximum and minimum values that are not considered outliers, and outliers are  
 285 plotted separately)

286

287

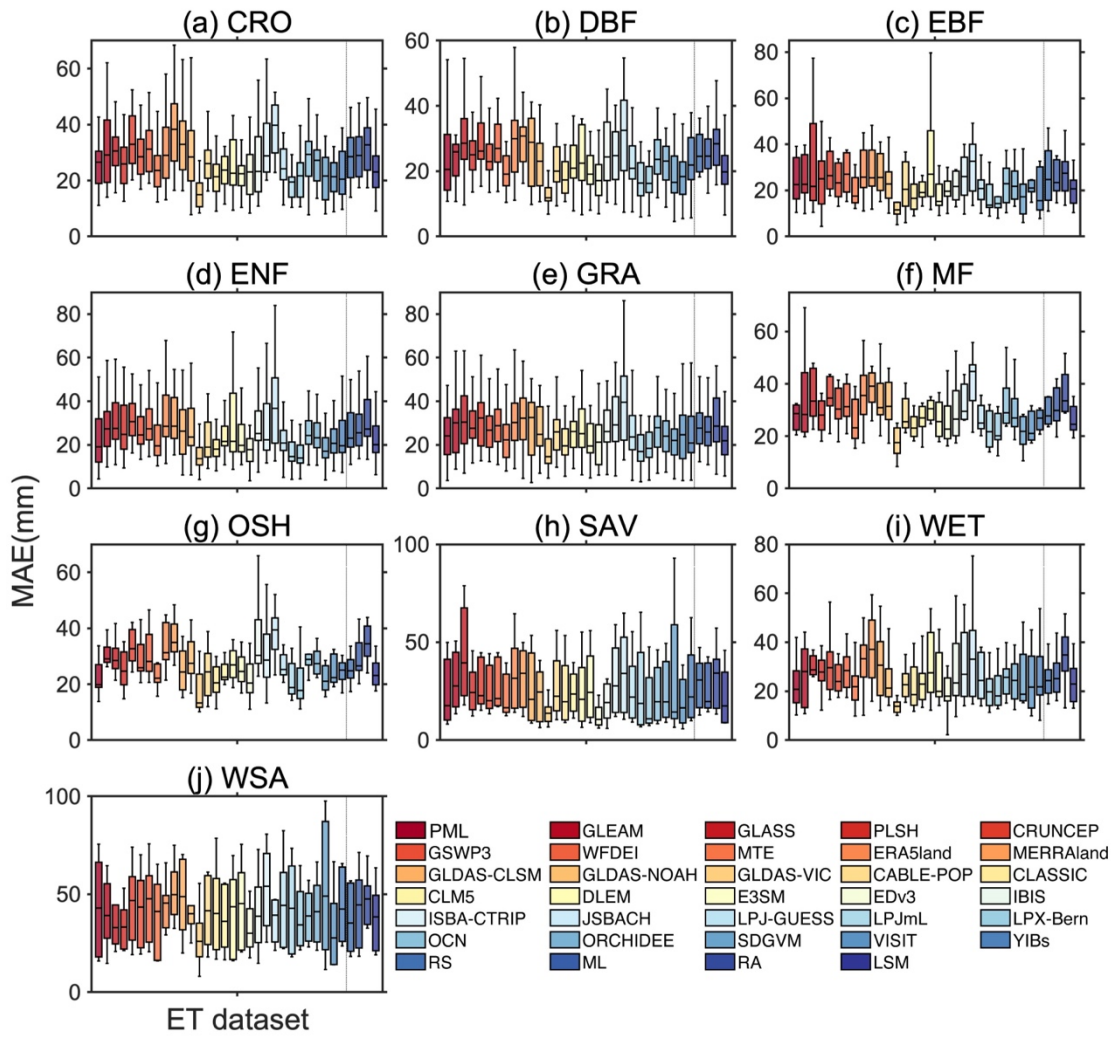

288

289 **Fig. S15:** Mean absolute errors (MAE) for each ET dataset and ET from FLUXNET  
 290 across vegetation types, 1991–2011. Each box-and-whisker plot represents the range of  
 291 uncertainty for the different sites in the scenario (for each box, the central horizontal  
 292 line represents the median of the sample, the upper and lower borders represent the 75th  
 293 and 25th percentile values, respectively, and the two ‘whiskers’ extend to the maximum  
 294 and minimum values that are not considered outliers, which are plotted separately).

295

296

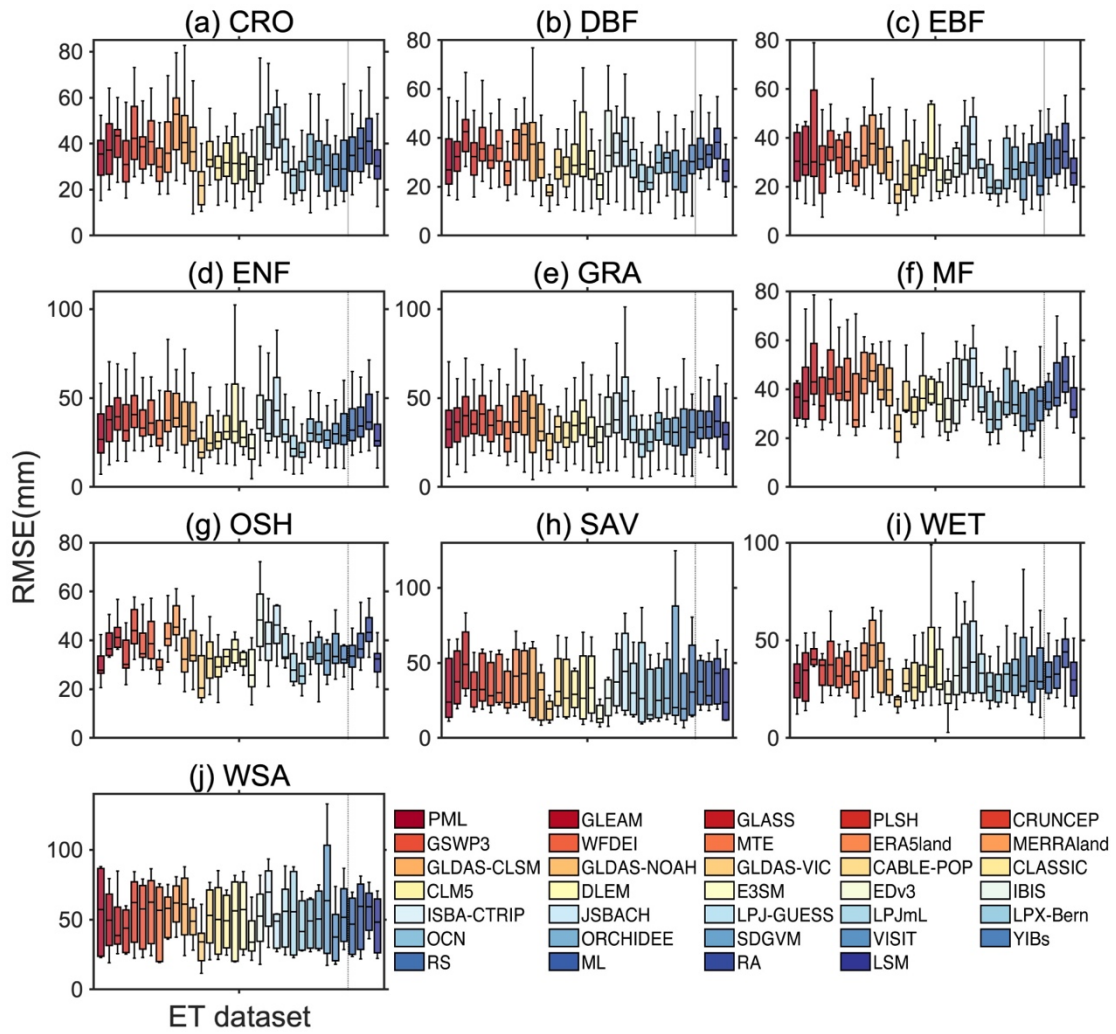

297

298 **Fig. S16:** Root-mean-square errors (RMSE) for each ET dataset and ET from  
 299 FLUXNET for different vegetation types, 1991–2011. Each box-and-whisker plot  
 300 represents the range of uncertainty for the different sites in the scenario (for each box,  
 301 the central horizontal line represents the median of the sample, the upper and lower  
 302 boundaries represent the 75th and 25th percentile values, respectively, and the two  
 303 ‘whiskers’ extend to the maximum and minimum values that are not considered outliers,  
 304 which are plotted separately).

305

306

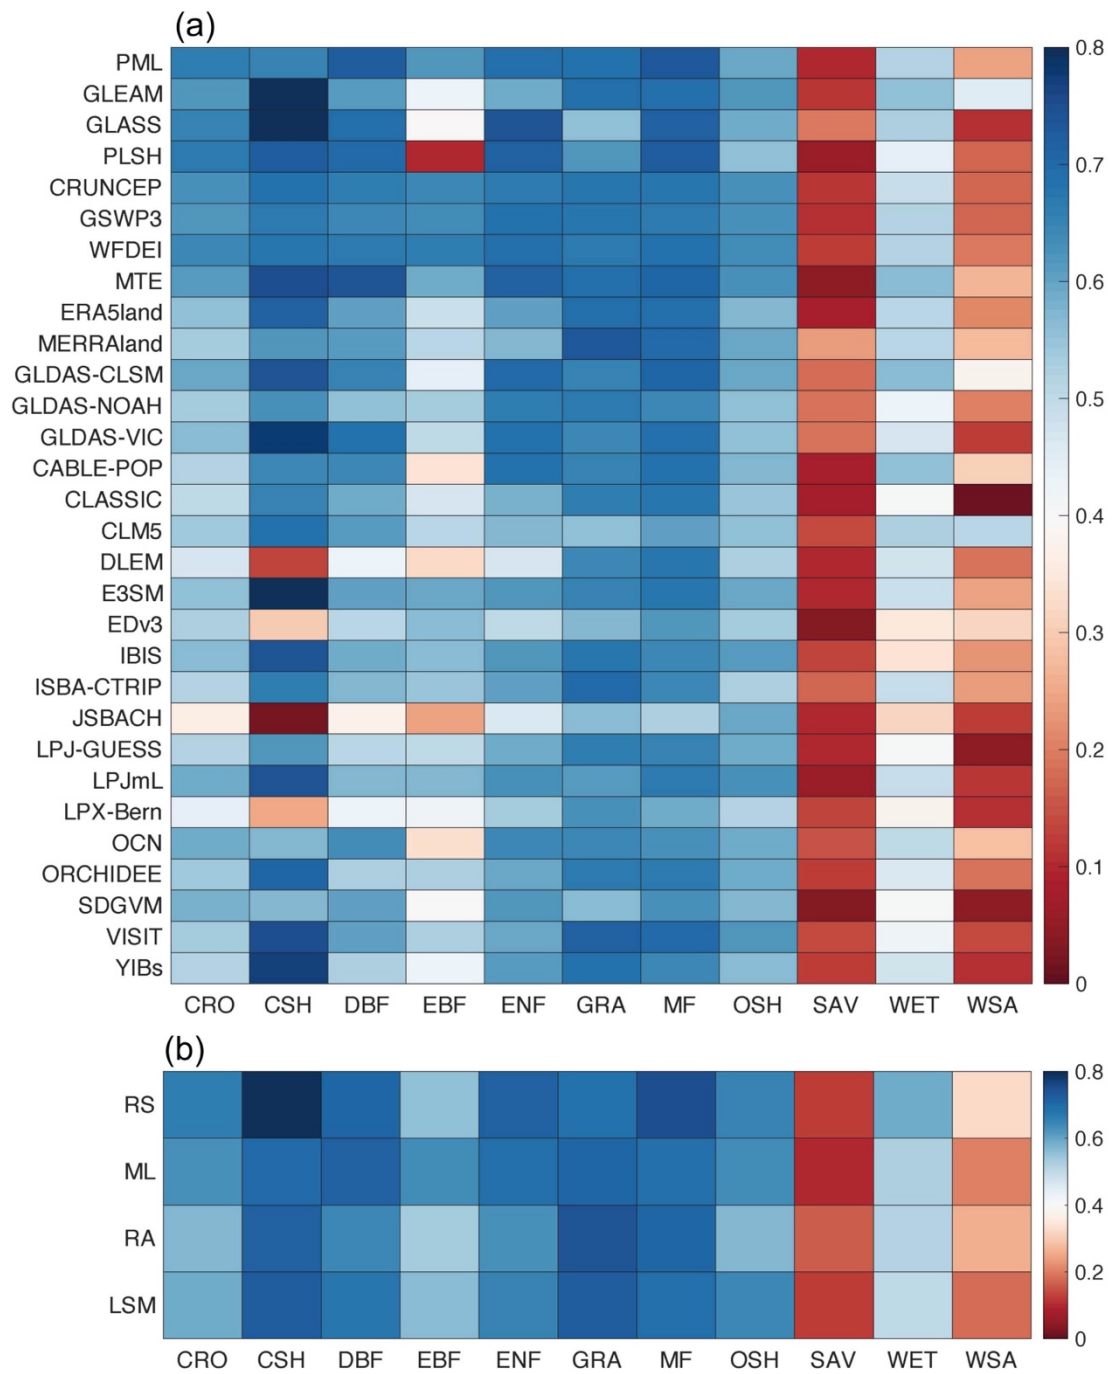

307

308 **Fig. S17:** Correlation coefficients between monthly values of ET datasets and ET from  
 309 FLUXNET for 12 vegetation types during 1991–2011.

310

311



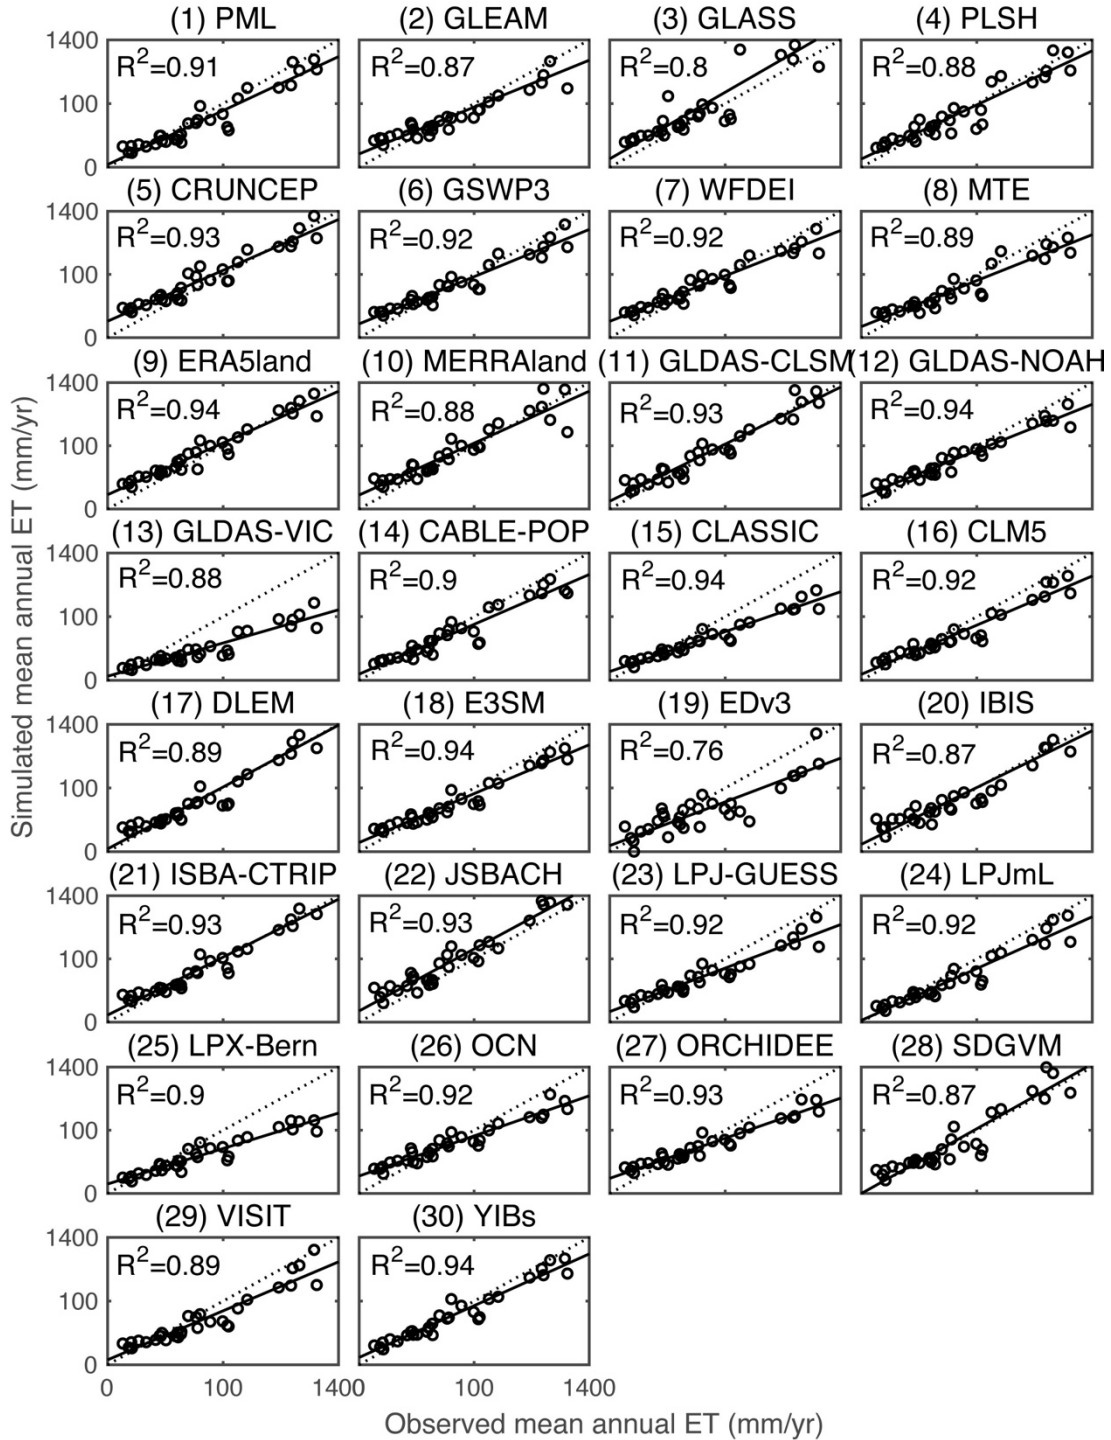

312

313 **Fig. S18:** Comparison of multi-year average evapotranspiration from 30 ET datasets

314 and multi-year average observed evapotranspiration from basin water balance.

315

316

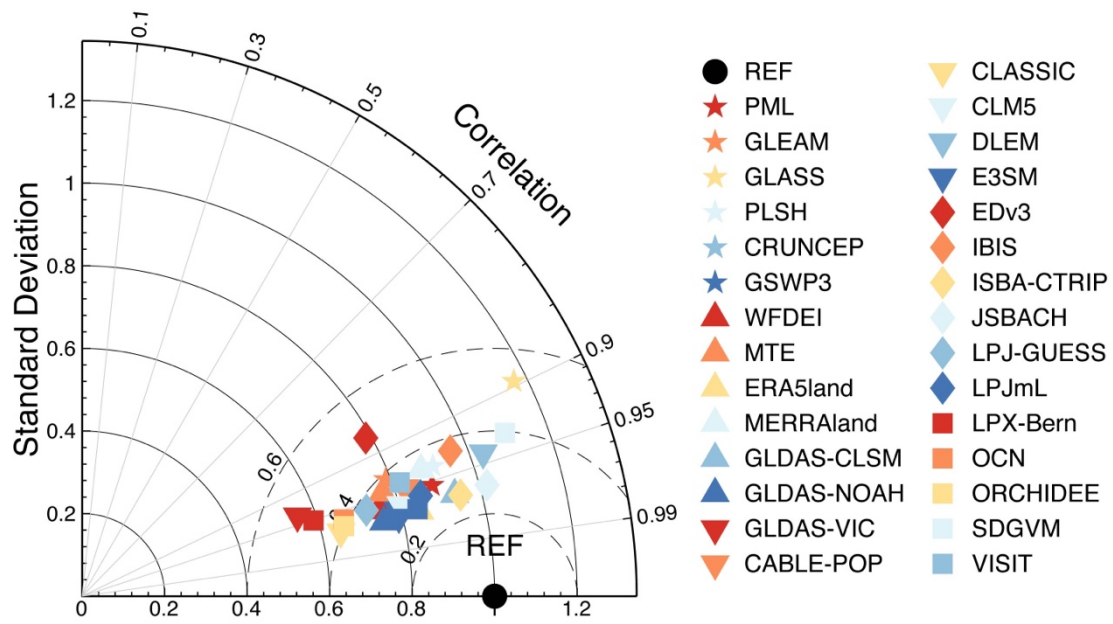

317

318 **Fig. S19:** Overall accuracy of simulated basin-scale evapotranspiration for all ET  
 319 datasets.

320

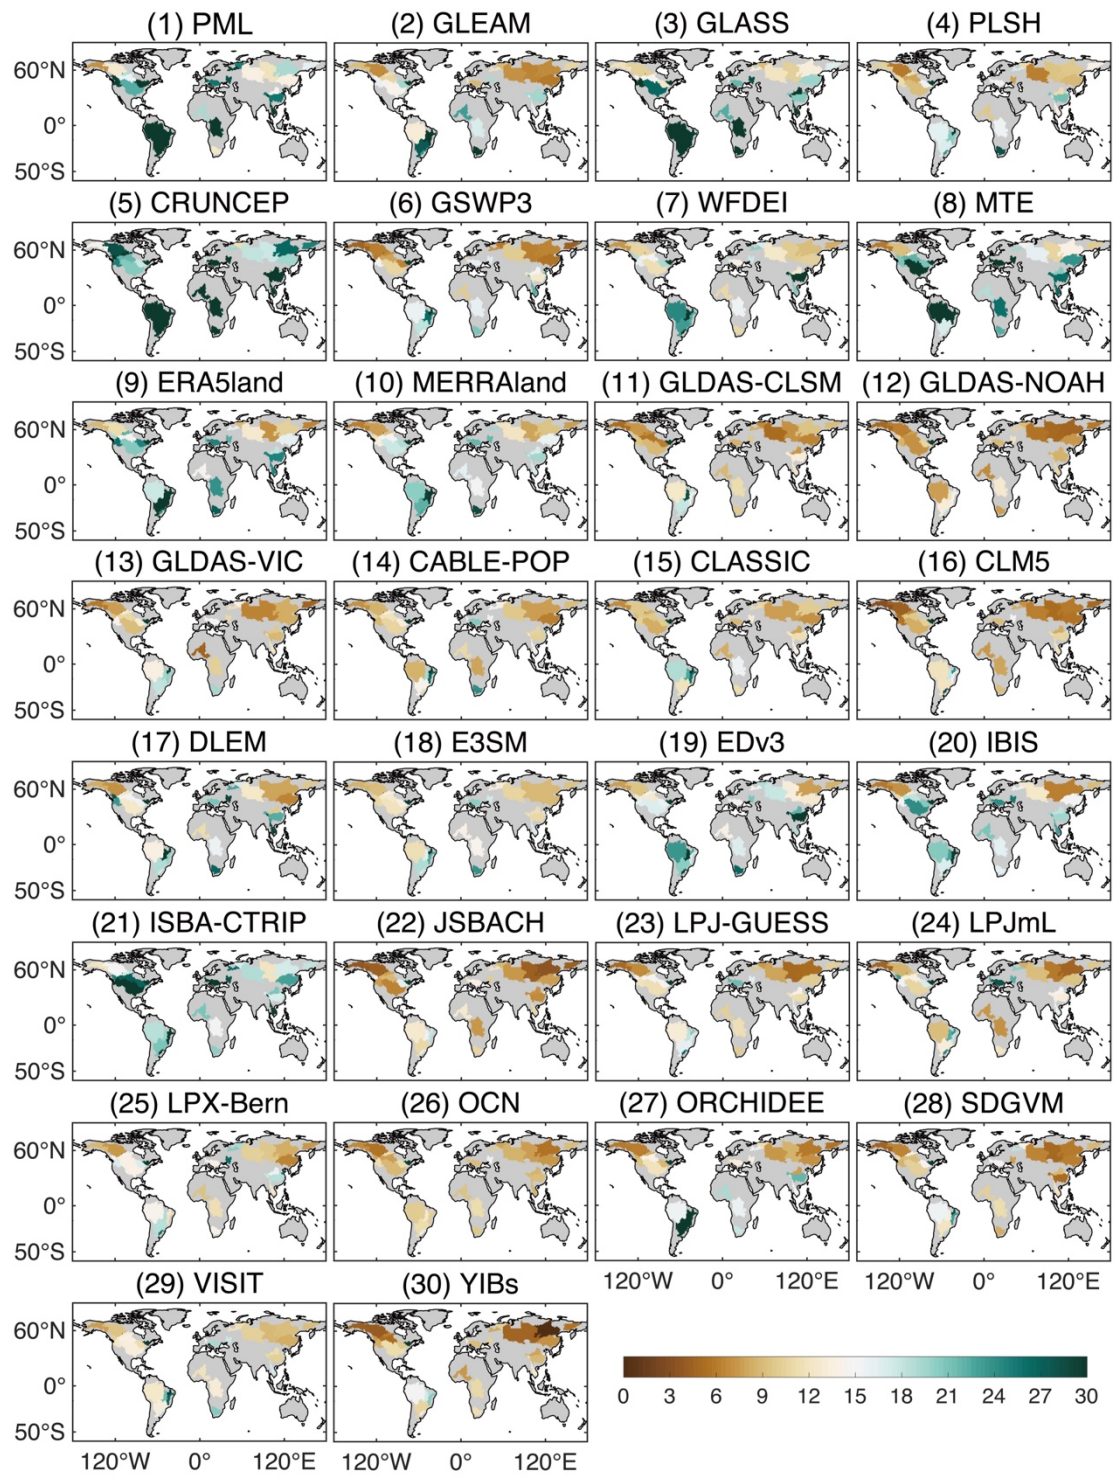

321

322 **Fig. S20:** Spatial distribution of TCH uncertainty for 32 basins globally during 1982–

323 2011 (unit: mm).

324



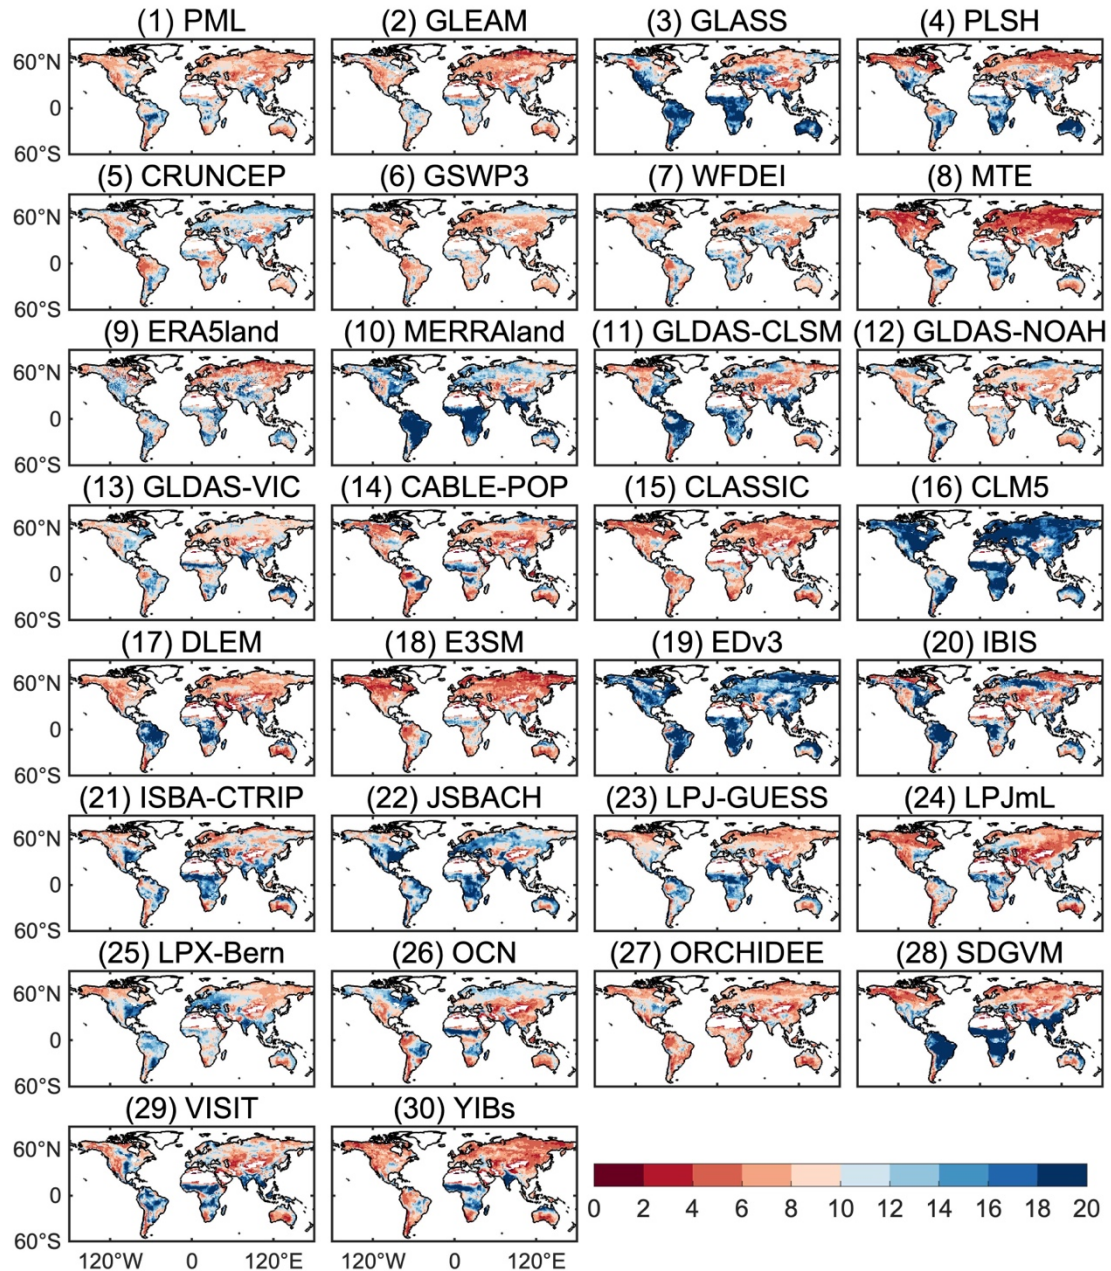

325

326 **Fig. S21:** Spatial distribution of uncertainty of TCH for each ET dataset on monthly  
 327 scale for the common coverage years from 1982 to 2011 (unit: mm).

328

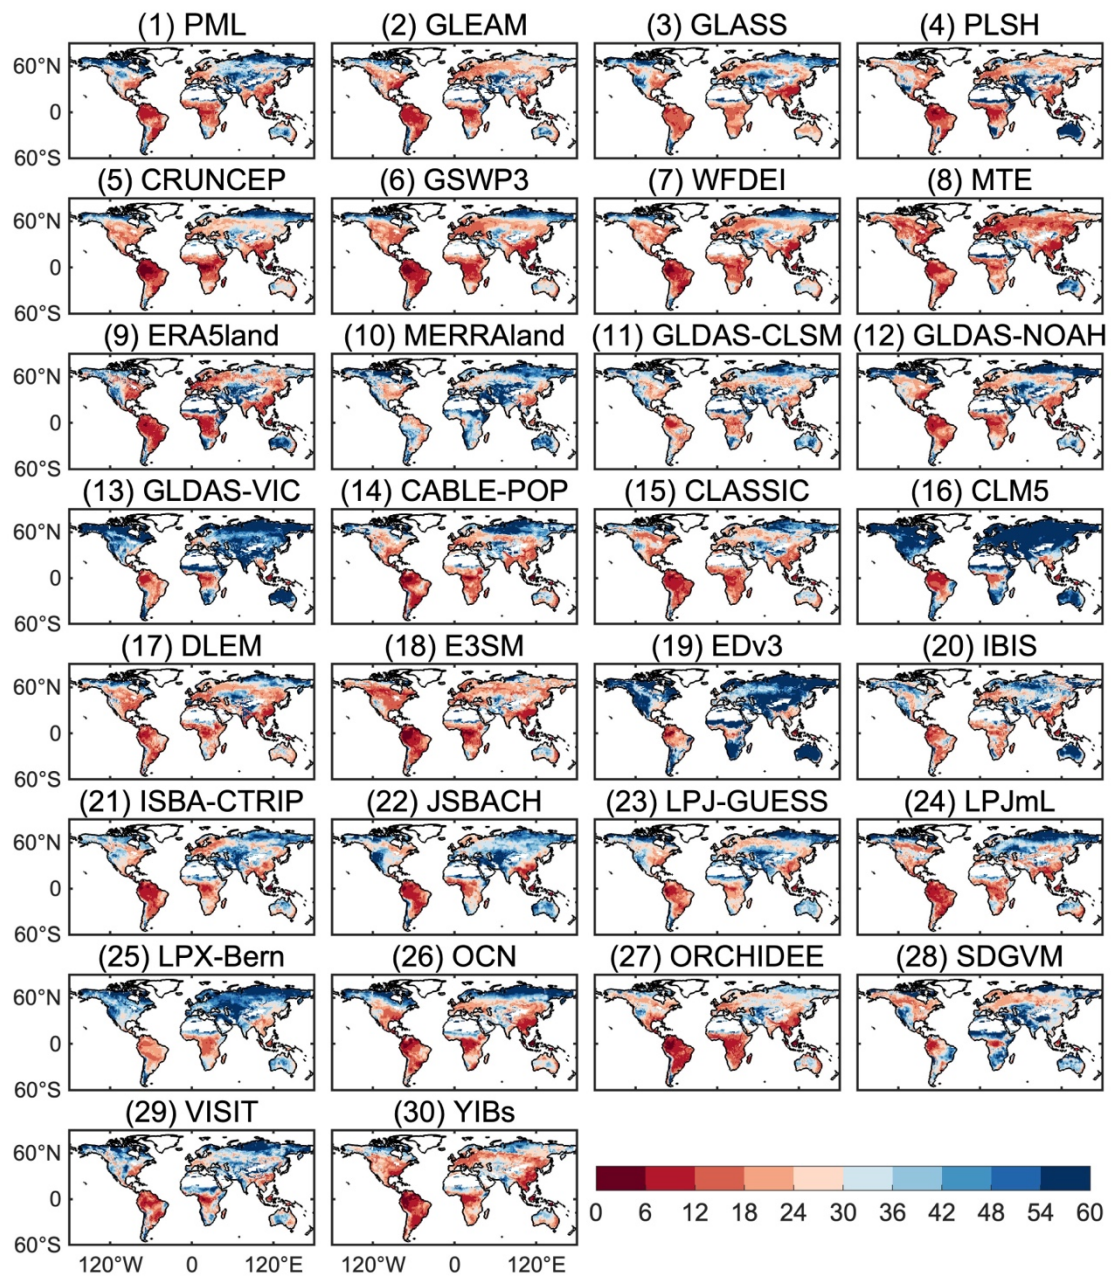

330

331 **Fig. S22:** Spatial distribution of relative uncertainty of TCH for each ET dataset on  
 332 monthly scale for the common coverage years from 1982 to 2011 (unit: %).

333

334

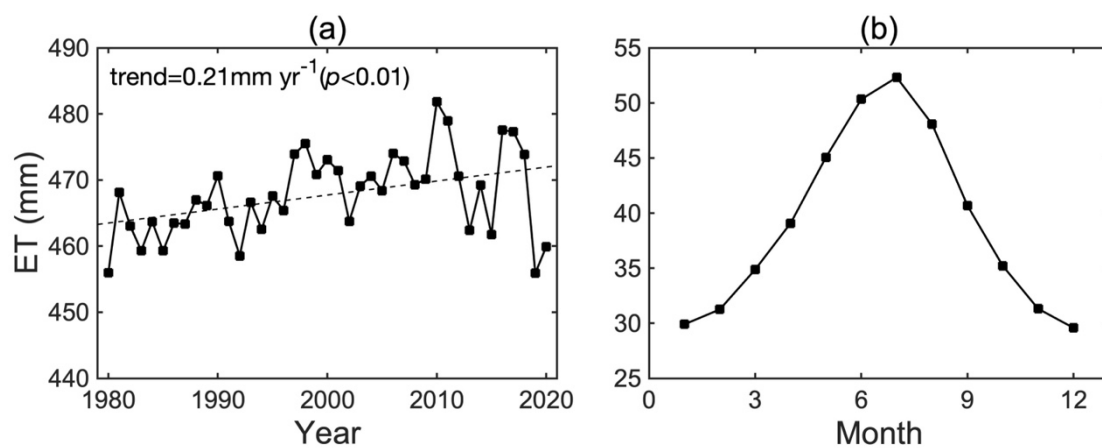

335

336 **Fig. S23:** Interannual and multi-year average seasonal variations of BMA-ET during

337 1980–2020.

338



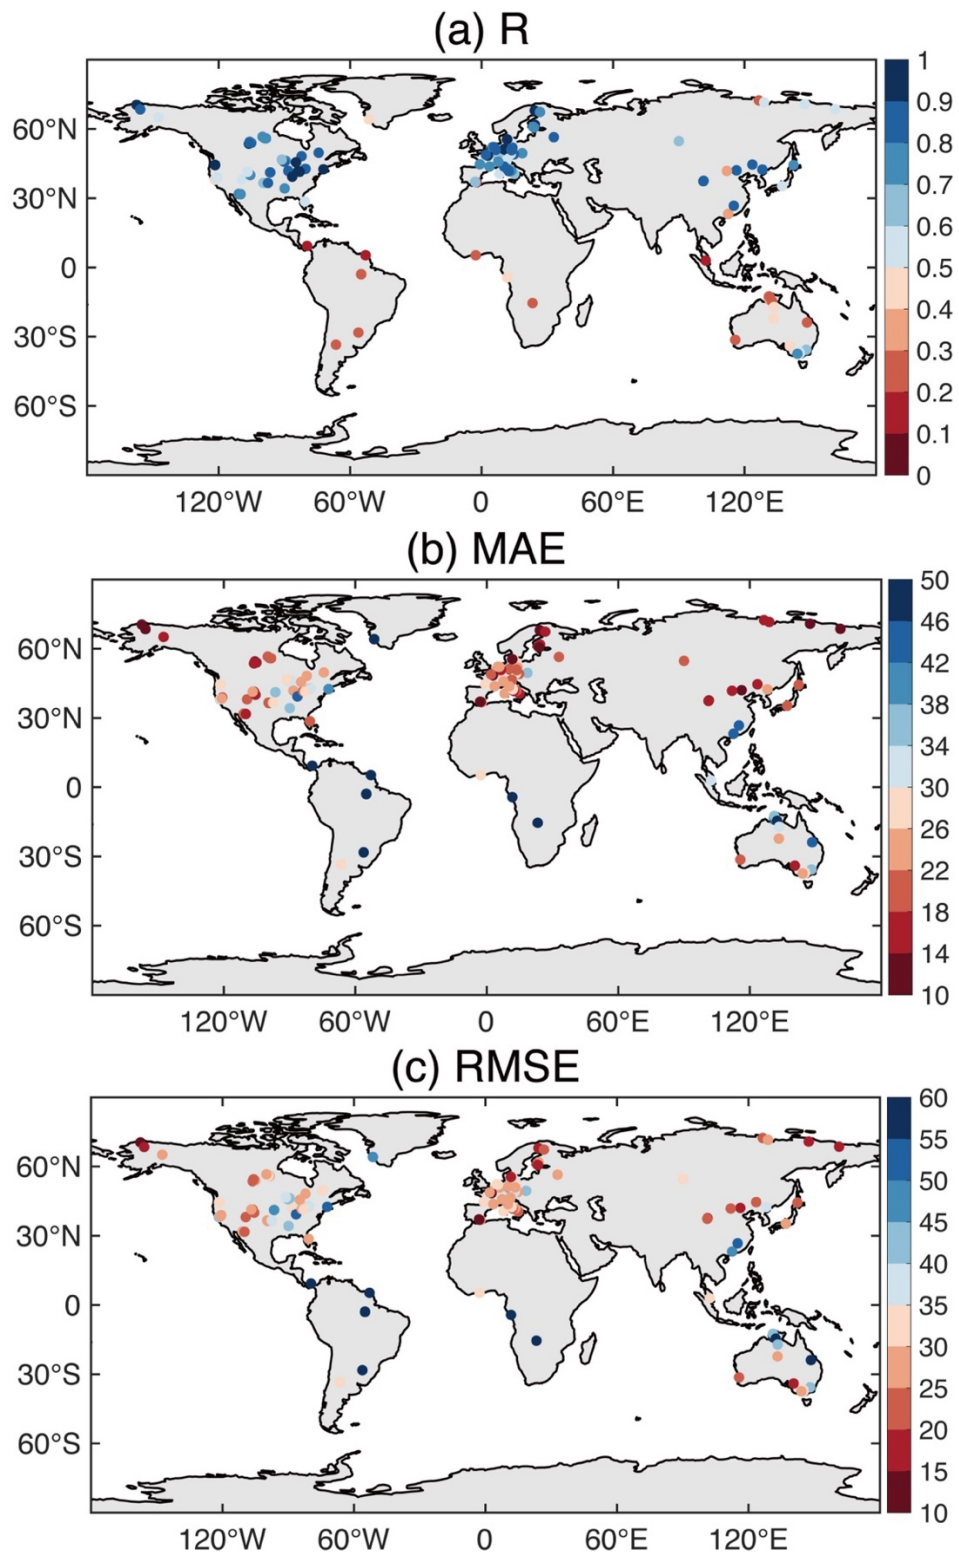

339

340 **Fig. S24:** Spatial distribution of correlation coefficient (R), mean absolute error (MAE)  
 341 and root mean square error (RMSE) verified by BMA-ET and ET from FLUXNET  
 342 from 1991 to 2011.

343

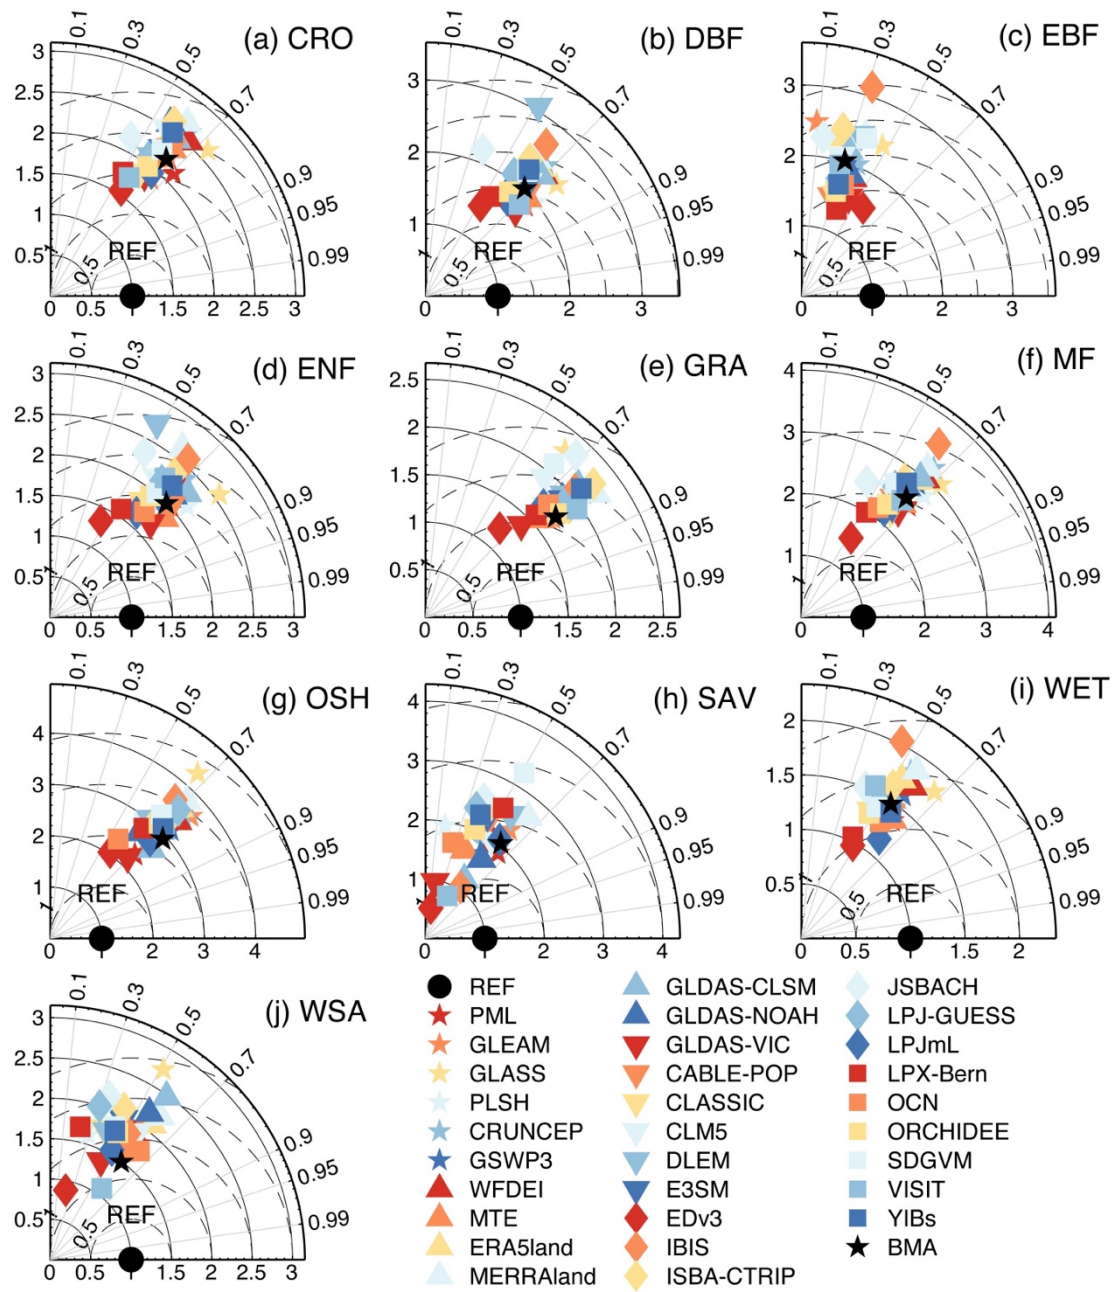

344

345 **Fig. S25:** Taylor diagram of ET datasets and BMA-ET at all sites under different  
 346 vegetation types at monthly scale from 1991 to 2011. The observation data is ET from  
 347 FLUXNET.

348

349

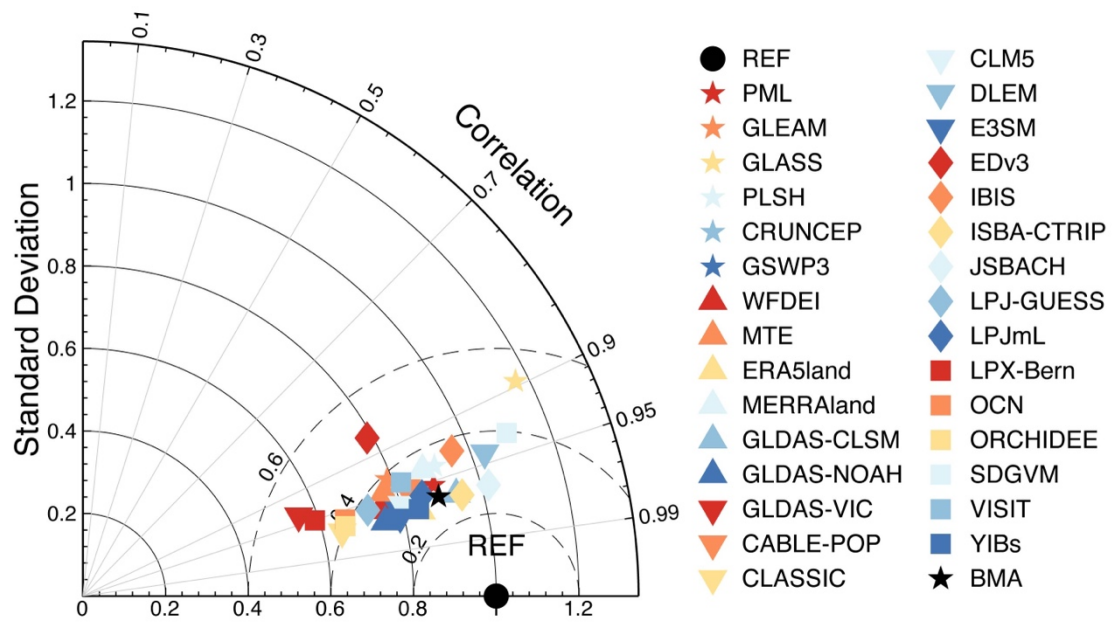

350

351 **Fig. S26:** Overall accuracy of all datasets and BMA-ET in simulating basin-scale  
352 evapotranspiration from 1982 to 2011.

353

354

355 **Table S1.** Data download links for evapotranspiration datasets.

| ID | Name               | Data download links                                                                                                                                                                                           |
|----|--------------------|---------------------------------------------------------------------------------------------------------------------------------------------------------------------------------------------------------------|
| 1  | PML                | <a href="https://doi.org/10.4225/08/5719A5C48DB85">https://doi.org/10.4225/08/5719A5C48DB85</a>                                                                                                               |
| 2  | GLEAM 3.6a         | <a href="https://www.gleam.eu/#downloads">https://www.gleam.eu/#downloads</a>                                                                                                                                 |
| 3  | GLASS              | <a href="http://www.glass.umd.edu/">http://www.glass.umd.edu/</a>                                                                                                                                             |
| 4  | PLSH               | <a href="http://files.ntsg.umt.edu/data/ET_global_monthly/Global_8kmResolution/">http://files.ntsg.umt.edu/data/ET_global_monthly/Global_8kmResolution/</a>                                                   |
| 5  | FLUXCOM-CRUNCEP_v8 | <a href="https://www.bgc-jena.mpg.de/geodb/projects/Data.php">https://www.bgc-jena.mpg.de/geodb/projects/Data.php</a>                                                                                         |
| 6  | FLUXCOM-GSWP3      | <a href="https://www.bgc-jena.mpg.de/geodb/projects/Data.php">https://www.bgc-jena.mpg.de/geodb/projects/Data.php</a>                                                                                         |
| 7  | FLUXCOM-WFDEI      | <a href="https://www.bgc-jena.mpg.de/geodb/projects/Data.php">https://www.bgc-jena.mpg.de/geodb/projects/Data.php</a>                                                                                         |
| 8  | MTE                | <a href="https://www.bgc-jena.mpg.de/geodb/projects/DataDnld.php">https://www.bgc-jena.mpg.de/geodb/projects/DataDnld.php</a>                                                                                 |
| 9  | ERA5-Land          | <a href="https://cds.climate.copernicus.eu/datasets/reanalysis-era5-land-monthly-means?tab=download">https://cds.climate.copernicus.eu/datasets/reanalysis-era5-land-monthly-means?tab=download</a>           |
| 10 | MERRA-Land         | <a href="https://gmao.gsfc.nasa.gov/reanalysis/MERRA-Land/data/">https://gmao.gsfc.nasa.gov/reanalysis/MERRA-Land/data/</a>                                                                                   |
| 11 | GLDAS CLSM 2.0     | <a href="https://disc.gsfc.nasa.gov/datasets?keywords=GLDAS&amp;page=1&amp;source=Models%20Catchment-LSM">https://disc.gsfc.nasa.gov/datasets?keywords=GLDAS&amp;page=1&amp;source=Models%20Catchment-LSM</a> |
| 12 | GLDAS NOAH 2.1     | <a href="https://disc.gsfc.nasa.gov/datasets?keywords=GLDAS&amp;page=1&amp;source=Models%20Noah-LSM">https://disc.gsfc.nasa.gov/datasets?keywords=GLDAS&amp;page=1&amp;source=Models%20Noah-LSM</a>           |
| 13 | GLDAS VIC          | <a href="https://disc.gsfc.nasa.gov/datasets?keywords=GLDAS&amp;page=1&amp;source=Models%20VIC-LSM">https://disc.gsfc.nasa.gov/datasets?keywords=GLDAS&amp;page=1&amp;source=Models%20VIC-LSM</a>             |
| 14 | CABLE-POP          | <a href="https://blogs.exeter.ac.uk/trendy/protocol/">https://blogs.exeter.ac.uk/trendy/protocol/</a>                                                                                                         |
| 15 | CLASSIC            | <a href="https://blogs.exeter.ac.uk/trendy/protocol/">https://blogs.exeter.ac.uk/trendy/protocol/</a>                                                                                                         |
| 16 | CLM5.0             | <a href="https://blogs.exeter.ac.uk/trendy/protocol/">https://blogs.exeter.ac.uk/trendy/protocol/</a>                                                                                                         |
| 17 | DLEM               | <a href="https://blogs.exeter.ac.uk/trendy/protocol/">https://blogs.exeter.ac.uk/trendy/protocol/</a>                                                                                                         |
| 18 | E3SM               | <a href="https://blogs.exeter.ac.uk/trendy/protocol/">https://blogs.exeter.ac.uk/trendy/protocol/</a>                                                                                                         |

|    |             |                                                                                                       |
|----|-------------|-------------------------------------------------------------------------------------------------------|
| 19 | EDv3        | <a href="https://blogs.exeter.ac.uk/trendy/protocol/">https://blogs.exeter.ac.uk/trendy/protocol/</a> |
| 20 | IBIS        | <a href="https://blogs.exeter.ac.uk/trendy/protocol/">https://blogs.exeter.ac.uk/trendy/protocol/</a> |
| 21 | ISBA-CTRIIP | <a href="https://blogs.exeter.ac.uk/trendy/protocol/">https://blogs.exeter.ac.uk/trendy/protocol/</a> |
| 22 | JSBACH      | <a href="https://blogs.exeter.ac.uk/trendy/protocol/">https://blogs.exeter.ac.uk/trendy/protocol/</a> |
| 23 | LPJ-GUESS   | <a href="https://blogs.exeter.ac.uk/trendy/protocol/">https://blogs.exeter.ac.uk/trendy/protocol/</a> |
| 24 | LPJmL       | <a href="https://blogs.exeter.ac.uk/trendy/protocol/">https://blogs.exeter.ac.uk/trendy/protocol/</a> |
| 25 | LPX-Bern    | <a href="https://blogs.exeter.ac.uk/trendy/protocol/">https://blogs.exeter.ac.uk/trendy/protocol/</a> |
| 26 | OCN         | <a href="https://blogs.exeter.ac.uk/trendy/protocol/">https://blogs.exeter.ac.uk/trendy/protocol/</a> |
| 27 | ORCHIDEE    | <a href="https://blogs.exeter.ac.uk/trendy/protocol/">https://blogs.exeter.ac.uk/trendy/protocol/</a> |
| 28 | SDGVM       | <a href="https://blogs.exeter.ac.uk/trendy/protocol/">https://blogs.exeter.ac.uk/trendy/protocol/</a> |
| 29 | VISIT       | <a href="https://blogs.exeter.ac.uk/trendy/protocol/">https://blogs.exeter.ac.uk/trendy/protocol/</a> |
| 30 | YIBs        | <a href="https://blogs.exeter.ac.uk/trendy/protocol/">https://blogs.exeter.ac.uk/trendy/protocol/</a> |

---



357 **Table S2.** Vegetation types to which ET from FLUXNET (174) belong and the number  
358 of sites corresponding to each vegetation type.

| ID | Name                         | Abbreviation | Number of sites |
|----|------------------------------|--------------|-----------------|
| 1  | Croplands                    | CRO          | 16              |
| 2  | Closed shrublands            | CSH          | 2               |
| 3  | Deciduous broadleaf forests  | DBF          | 22              |
| 4  | Deciduous needleleaf forests | DNF          | 1               |
| 5  | Evergreen broadleaf forests  | EBF          | 14              |
| 6  | Evergreen needleleaf forests | ENF          | 42              |
| 7  | Grasslands                   | GRA          | 33              |
| 8  | Mixed forests                | MF           | 9               |
| 9  | Open shrublands              | OSH          | 10              |
| 10 | Savannas                     | SAV          | 3               |
| 11 | Wetlands                     | WET          | 16              |
| 12 | Woody savannas               | WSA          | 6               |

359

360

361

362 **Table S3.** Vegetation types and time ranges for the 174 ET from FLUXNET used in  
 363 this study.

| ID | Name   | Latitude | Longitude | IGBP | Start year | End year |
|----|--------|----------|-----------|------|------------|----------|
| 1  | AR-SLu | -33.4648 | -66.4598  | MF   | 2009       | 2011     |
| 2  | AR-Vir | -28.2395 | -56.1886  | ENF  | 2009       | 2012     |
| 3  | AT-Neu | 47.1167  | 11.3175   | GRA  | 2002       | 2012     |
| 4  | AU-ASM | -22.283  | 133.249   | SAV  | 2010       | 2014     |
| 5  | AU-Ade | -13.0769 | 131.1178  | WSA  | 2007       | 2009     |
| 6  | AU-Cpr | -34.0021 | 140.5891  | SAV  | 2010       | 2014     |
| 7  | AU-Cum | -33.6152 | 150.7236  | EBF  | 2012       | 2014     |
| 8  | AU-DaP | -14.0633 | 131.3181  | GRA  | 2007       | 2013     |
| 9  | AU-Emr | -23.8587 | 148.4746  | GRA  | 2011       | 2013     |
| 10 | AU-Fog | -12.5452 | 131.3072  | WET  | 2006       | 2008     |
| 11 | AU-Gin | -31.3764 | 115.7138  | WSA  | 2011       | 2014     |
| 12 | AU-How | -12.4943 | 131.1523  | WSA  | 2001       | 2014     |
| 13 | AU-RDF | -14.5636 | 132.4776  | WSA  | 2011       | 2013     |
| 14 | AU-Rig | -36.6499 | 145.5759  | GRA  | 2011       | 2014     |
| 15 | AU-Stp | -17.1507 | 133.3502  | GRA  | 2008       | 2014     |
| 16 | AU-TTE | -22.287  | 133.64    | GRA  | 2012       | 2014     |
| 17 | AU-Tum | -35.6566 | 148.1517  | EBF  | 2001       | 2014     |
| 18 | AU-Wac | -37.4259 | 145.1878  | EBF  | 2005       | 2008     |
| 19 | AU-Whr | -36.6732 | 145.0294  | EBF  | 2011       | 2014     |
| 20 | AU-Wom | -37.4222 | 144.0944  | EBF  | 2010       | 2014     |
| 21 | AU-Ync | -34.9893 | 146.2907  | GRA  | 2012       | 2014     |
| 22 | BE-Bra | 51.3076  | 4.5198    | MF   | 1996       | 2014     |
| 23 | BE-Lon | 50.5516  | 4.7462    | CRO  | 2004       | 2014     |
| 24 | BE-Vie | 50.3049  | 5.9981    | MF   | 1996       | 2014     |
| 25 | BR-Sa1 | -2.8567  | -54.9589  | EBF  | 2002       | 2011     |
| 26 | BR-Sa3 | -3.018   | -54.9714  | EBF  | 2000       | 2004     |
| 27 | CA-Gro | 48.2167  | -82.1556  | MF   | 2003       | 2014     |
| 28 | CA-Man | 55.8796  | -98.4808  | ENF  | 1994       | 2008     |
| 29 | CA-NS1 | 55.8792  | -98.4839  | ENF  | 2001       | 2005     |

---

|    |        |         |           |     |      |      |
|----|--------|---------|-----------|-----|------|------|
| 30 | CA-NS2 | 55.9058 | -98.5247  | ENF | 2001 | 2005 |
| 31 | CA-NS3 | 55.9117 | -98.3822  | ENF | 2001 | 2005 |
| 32 | CA-NS4 | 55.9144 | -98.3806  | ENF | 2002 | 2005 |
| 33 | CA-NS5 | 55.8631 | -98.485   | ENF | 2001 | 2005 |
| 34 | CA-NS6 | 55.9167 | -98.9644  | OSH | 2001 | 2005 |
| 35 | CA-NS7 | 56.6358 | -99.9483  | OSH | 2002 | 2005 |
| 36 | CA-Oas | 53.6289 | -106.1978 | DBF | 1996 | 2010 |
| 37 | CA-Obs | 53.9872 | -105.1178 | ENF | 1997 | 2010 |
| 38 | CA-Qfo | 49.6925 | -74.3421  | ENF | 2003 | 2010 |
| 39 | CA-SF1 | 54.485  | -105.8176 | ENF | 2003 | 2006 |
| 40 | CA-SF2 | 54.2539 | -105.8775 | ENF | 2001 | 2005 |
| 41 | CA-SF3 | 54.0916 | -106.0053 | OSH | 2001 | 2006 |
| 42 | CA-TP1 | 42.6609 | -80.5595  | ENF | 2002 | 2014 |
| 43 | CA-TP2 | 42.7744 | -80.4588  | ENF | 2002 | 2007 |
| 44 | CA-TP3 | 42.7068 | -80.3483  | ENF | 2002 | 2014 |
| 45 | CA-TP4 | 42.7102 | -80.3574  | ENF | 2002 | 2014 |
| 46 | CA-TPD | 42.6353 | -80.5577  | DBF | 2012 | 2014 |
| 47 | CG-Tch | -4.2892 | 11.6564   | SAV | 2006 | 2009 |
| 48 | CH-Cha | 47.2102 | 8.4104    | GRA | 2005 | 2014 |
| 49 | CH-Dav | 46.8153 | 9.8559    | ENF | 1997 | 2014 |
| 50 | CH-Fru | 47.1158 | 8.5378    | GRA | 2005 | 2014 |
| 51 | CH-Lae | 47.4783 | 8.3644    | MF  | 2004 | 2014 |
| 52 | CH-Oe1 | 47.2858 | 7.7319    | GRA | 2002 | 2008 |
| 53 | CH-Oe2 | 47.2864 | 7.7337    | CRO | 2004 | 2014 |
| 54 | CN-Cha | 42.4025 | 128.0958  | MF  | 2003 | 2005 |
| 55 | CN-Cng | 44.5934 | 123.5092  | GRA | 2007 | 2010 |
| 56 | CN-Din | 23.1733 | 112.5361  | EBF | 2003 | 2005 |
| 57 | CN-Du2 | 42.0467 | 116.2836  | GRA | 2006 | 2008 |
| 58 | CN-Ha2 | 37.6086 | 101.3269  | WET | 2003 | 2005 |
| 59 | CN-HaM | 37.37   | 101.18    | GRA | 2002 | 2004 |
| 60 | CN-Qia | 26.7414 | 115.0581  | ENF | 2003 | 2005 |
| 61 | CN-Sw2 | 41.7902 | 111.8971  | GRA | 2010 | 2012 |
| 62 | CZ-BK1 | 49.5021 | 18.5369   | ENF | 2004 | 2014 |

---

---

|    |        |         |          |     |      |      |
|----|--------|---------|----------|-----|------|------|
| 63 | CZ-BK2 | 49.4944 | 18.5429  | GRA | 2004 | 2012 |
| 64 | CZ-wet | 49.0247 | 14.7704  | WET | 2006 | 2014 |
| 65 | DE-Akm | 53.8662 | 13.6834  | WET | 2009 | 2014 |
| 66 | DE-Geb | 51.0997 | 10.9146  | CRO | 2001 | 2014 |
| 67 | DE-Gri | 50.95   | 13.5126  | GRA | 2004 | 2014 |
| 68 | DE-Hai | 51.0792 | 10.4522  | DBF | 2000 | 2012 |
| 69 | DE-Kli | 50.8931 | 13.5224  | CRO | 2004 | 2014 |
| 70 | DE-Lkb | 49.0996 | 13.3047  | ENF | 2009 | 2013 |
| 71 | DE-Lnf | 51.3282 | 10.3678  | DBF | 2002 | 2012 |
| 72 | DE-Obe | 50.7867 | 13.7213  | ENF | 2008 | 2014 |
| 73 | DE-RuR | 50.6219 | 6.3041   | GRA | 2011 | 2014 |
| 74 | DE-RuS | 50.8659 | 6.4471   | CRO | 2011 | 2014 |
| 75 | DE-Seh | 50.8706 | 6.4497   | CRO | 2007 | 2010 |
| 76 | DE-SfN | 47.8064 | 11.3275  | WET | 2012 | 2014 |
| 77 | DE-Spw | 51.8922 | 14.0337  | WET | 2010 | 2014 |
| 78 | DE-Tha | 50.9626 | 13.5651  | ENF | 1996 | 2014 |
| 79 | DK-Eng | 55.6905 | 12.1918  | GRA | 2005 | 2008 |
| 80 | DK-Sor | 55.4859 | 11.6446  | DBF | 1996 | 2014 |
| 81 | ES-Amo | 36.8336 | -2.2523  | OSH | 2007 | 2012 |
| 82 | ES-LJu | 36.9266 | -2.7521  | OSH | 2004 | 2013 |
| 83 | ES-LgS | 37.0979 | -2.9658  | OSH | 2007 | 2009 |
| 84 | FI-Hyy | 61.8474 | 24.2948  | ENF | 1996 | 2014 |
| 85 | FI-Jok | 60.8986 | 23.5134  | CRO | 2000 | 2003 |
| 86 | FI-Let | 60.6418 | 23.9595  | ENF | 2009 | 2012 |
| 87 | FI-Lom | 67.9972 | 24.2092  | WET | 2007 | 2009 |
| 88 | FI-Sod | 67.3624 | 26.6386  | ENF | 2001 | 2014 |
| 89 | FR-Fon | 48.4764 | 2.7801   | DBF | 2005 | 2014 |
| 90 | FR-Gri | 48.8442 | 1.9519   | CRO | 2004 | 2014 |
| 91 | FR-LBr | 44.7171 | -0.7693  | ENF | 1996 | 2008 |
| 92 | FR-Pue | 43.7413 | 3.5957   | EBF | 2000 | 2014 |
| 93 | GF-Guy | 5.2788  | -52.9249 | EBF | 2004 | 2014 |
| 94 | GH-Ank | 5.2685  | -2.6942  | EBF | 2011 | 2014 |
| 95 | GL-NuF | 64.1308 | -51.3861 | WET | 2008 | 2014 |

---

---

|     |        |         |          |     |      |      |
|-----|--------|---------|----------|-----|------|------|
| 96  | IT-BCi | 40.5237 | 14.9574  | CRO | 2004 | 2014 |
| 97  | IT-CA1 | 42.3804 | 12.0266  | DBF | 2011 | 2014 |
| 98  | IT-CA2 | 42.3772 | 12.026   | CRO | 2011 | 2014 |
| 99  | IT-CA3 | 42.38   | 12.0222  | DBF | 2011 | 2014 |
| 100 | IT-Col | 41.8494 | 13.5881  | DBF | 1996 | 2014 |
| 101 | IT-Cp2 | 41.7043 | 12.3573  | EBF | 2012 | 2014 |
| 102 | IT-Cpz | 41.7052 | 12.3761  | EBF | 1997 | 2009 |
| 103 | IT-La2 | 45.9542 | 11.2853  | ENF | 2000 | 2002 |
| 104 | IT-Lav | 45.9562 | 11.2813  | ENF | 2003 | 2014 |
| 105 | IT-MBo | 46.0147 | 11.0458  | GRA | 2003 | 2013 |
| 106 | IT-Noe | 40.6062 | 8.1517   | CSH | 2004 | 2014 |
| 107 | IT-PT1 | 45.2009 | 9.061    | DBF | 2002 | 2004 |
| 108 | IT-Ren | 46.5869 | 11.4337  | ENF | 1998 | 2013 |
| 109 | IT-Ro1 | 42.4081 | 11.93    | DBF | 2000 | 2008 |
| 110 | IT-Ro2 | 42.3903 | 11.9209  | DBF | 2002 | 2012 |
| 111 | IT-SRo | 43.7279 | 10.2844  | ENF | 1999 | 2012 |
| 112 | IT-Tor | 45.8444 | 7.5781   | GRA | 2008 | 2014 |
| 113 | JP-MBF | 44.3869 | 142.3186 | DBF | 2003 | 2005 |
| 114 | JP-SMF | 35.2617 | 137.0788 | MF  | 2002 | 2006 |
| 115 | MY-PSO | 2.973   | 102.3062 | EBF | 2003 | 2009 |
| 116 | NL-Hor | 52.2403 | 5.0713   | GRA | 2004 | 2011 |
| 117 | NL-Loo | 52.1666 | 5.7436   | ENF | 1996 | 2014 |
| 118 | PA-SPn | 9.3181  | -79.6346 | DBF | 2007 | 2009 |
| 119 | PA-SPs | 9.3138  | -79.6314 | GRA | 2007 | 2009 |
| 120 | RU-Che | 68.613  | 161.3414 | WET | 2002 | 2005 |
| 121 | RU-Cok | 70.8291 | 147.4943 | OSH | 2003 | 2014 |
| 122 | RU-Fyo | 56.4615 | 32.9221  | ENF | 1998 | 2014 |
| 123 | RU-Ha1 | 54.7252 | 90.0022  | GRA | 2002 | 2004 |
| 124 | RU-Sam | 72.3738 | 126.4958 | GRA | 2002 | 2014 |
| 125 | RU-SkP | 62.255  | 129.168  | DNF | 2012 | 2014 |
| 126 | RU-Tks | 71.5943 | 128.8878 | GRA | 2010 | 2014 |
| 127 | SE-St1 | 68.3541 | 19.0503  | WET | 2012 | 2014 |
| 128 | US-AR1 | 36.4267 | -99.42   | GRA | 2009 | 2012 |

---

---

|     |        |         |           |     |      |      |
|-----|--------|---------|-----------|-----|------|------|
| 129 | US-AR2 | 36.6358 | -99.5975  | GRA | 2009 | 2012 |
| 130 | US-ARM | 36.6058 | -97.4888  | CRO | 2003 | 2012 |
| 131 | US-Atq | 70.4696 | -157.4089 | WET | 2003 | 2008 |
| 132 | US-Blo | 38.8953 | -120.6328 | ENF | 1997 | 2007 |
| 133 | US-CRT | 41.6285 | -83.3471  | CRO | 2011 | 2013 |
| 134 | US-Cop | 38.09   | -109.39   | GRA | 2001 | 2007 |
| 135 | US-GBT | 41.3658 | -106.2397 | ENF | 1999 | 2006 |
| 136 | US-GLE | 41.3665 | -106.2399 | ENF | 2004 | 2014 |
| 137 | US-Goo | 34.2547 | -89.8735  | GRA | 2002 | 2006 |
| 138 | US-Ha1 | 42.5378 | -72.1715  | DBF | 1991 | 2012 |
| 139 | US-IB2 | 41.8406 | -88.241   | GRA | 2004 | 2011 |
| 140 | US-Ivo | 68.4865 | -155.7503 | WET | 2004 | 2007 |
| 141 | US-KS2 | 28.6086 | -80.6715  | CSH | 2003 | 2006 |
| 142 | US-Los | 46.0827 | -89.9792  | WET | 2000 | 2014 |
| 143 | US-MMS | 39.3232 | -86.4131  | DBF | 1999 | 2014 |
| 144 | US-Me2 | 44.4523 | -121.5574 | ENF | 2002 | 2014 |
| 145 | US-Me3 | 44.3154 | -121.6078 | ENF | 2004 | 2009 |
| 146 | US-Me4 | 44.4992 | -121.6224 | ENF | 1996 | 2000 |
| 147 | US-Me5 | 44.4372 | -121.5668 | ENF | 2000 | 2002 |
| 148 | US-Me6 | 44.3233 | -121.6078 | ENF | 2010 | 2014 |
| 149 | US-Myb | 38.0499 | -121.765  | WET | 2010 | 2014 |
| 150 | US-NR1 | 40.0329 | -105.5464 | ENF | 1998 | 2014 |
| 151 | US-Ne1 | 41.1651 | -96.4766  | CRO | 2001 | 2013 |
| 152 | US-Ne2 | 41.1649 | -96.4701  | CRO | 2001 | 2013 |
| 153 | US-Ne3 | 41.1797 | -96.4397  | CRO | 2001 | 2013 |
| 154 | US-Oho | 41.5545 | -83.8438  | DBF | 2004 | 2013 |
| 155 | US-PFa | 45.9459 | -90.2723  | MF  | 1995 | 2014 |
| 156 | US-Prr | 65.1237 | -147.4876 | ENF | 2010 | 2014 |
| 157 | US-SRC | 31.9083 | -110.8395 | OSH | 2008 | 2014 |
| 158 | US-SRG | 31.7894 | -110.8277 | GRA | 2008 | 2014 |
| 159 | US-SRM | 31.8214 | -110.8661 | WSA | 2004 | 2014 |
| 160 | US-Sta | 41.3966 | -106.8024 | OSH | 2005 | 2009 |
| 161 | US-Syv | 46.242  | -89.3477  | MF  | 2001 | 2014 |

---

---

|     |        |          |           |     |      |      |
|-----|--------|----------|-----------|-----|------|------|
| 162 | US-Ton | 38.4309  | -120.966  | WSA | 2001 | 2014 |
| 163 | US-Tw1 | 38.1074  | -121.6469 | WET | 2012 | 2014 |
| 164 | US-Twt | 38.1087  | -121.6531 | CRO | 2009 | 2014 |
| 165 | US-UMB | 45.5598  | -84.7138  | DBF | 2000 | 2014 |
| 166 | US-UMd | 45.5625  | -84.6975  | DBF | 2007 | 2014 |
| 167 | US-Var | 38.4133  | -120.9508 | GRA | 2000 | 2014 |
| 168 | US-WCr | 45.8059  | -90.0799  | DBF | 1999 | 2014 |
| 169 | US-WPT | 41.4646  | -82.9962  | WET | 2011 | 2013 |
| 170 | US-Whs | 31.7438  | -110.0522 | OSH | 2007 | 2014 |
| 171 | US-Wi3 | 46.6347  | -91.0987  | DBF | 2002 | 2004 |
| 172 | US-Wi4 | 46.7393  | -91.1663  | ENF | 2002 | 2005 |
| 173 | US-Wkg | 31.7365  | -109.9419 | GRA | 2004 | 2014 |
| 174 | ZM-Mon | -15.4391 | 23.2525   | DBF | 2000 | 2009 |

---

364

365

366 **Table S4.** The variable information from ET from FLUXNET used in this study.

| ID | Variable name | Full name of variable |
|----|---------------|-----------------------|
| 1  | P_F           | Precipitation         |
| 2  | LE_F_MDS      | Latent heat flux      |
| 3  | H_F_MDS       | Sensible heat flux    |
| 4  | G_F_MDS       | Soil heat flux        |
| 5  | RH            | Relative humidity     |
| 6  | NETRAD        | Net radiation         |

367

368



369 **Table S5.** Basin information.

| ID | Basin name    | Country      | Station name        | Station longitude | Station latitude | Starting and ending year |
|----|---------------|--------------|---------------------|-------------------|------------------|--------------------------|
| 1  | Amazon        | Brazil       | Obidos              | -55.51            | -1.95            | 1927–2018                |
| 2  | Amur          | Russia       | Komsomolsk          | 137.00            | 50.53            | 1900–2006                |
| 3  | Churchill     | Canada       | Churchill River     | -94.62            | 58.12            | 1928–2013                |
| 4  | Columbia      | USA          | The Dalles          | -121.17           | 45.61            | 1900–2018                |
| 5  | Congo         | Congo        | Kinshasa            | 15.30             | -4.30            | 1903–2010                |
| 6  | Danube        | Romania      | Ceatal Izma         | 28.73             | 45.22            | 1900–2010                |
| 7  | Don           | Russia       | Razdorskaya         | 40.65             | 47.53            | 1881–2010                |
| 8  | Fraser        | Canada       | Hope                | -121.45           | 49.38            | 1912–2016                |
| 9  | Huaihe        | China        | Bengbu              | 117.37            | 32.94            | 1915–2004                |
| 10 | Kolyma        | Russia       | Kolymskoye          | 158.72            | 68.73            | 1927–2008                |
| 11 | Lena          | Russia       | Kusur               | 127.39            | 70.68            | 1934–2011                |
| 12 | MacKenzie     | Canada       | Arctic Red          | -133.74           | 67.46            | 1943–2016                |
| 13 | Mekong        | Laos         | Pakse               | 105.80            | 15.11            | 1923–2005                |
| 14 | Mississippi   | USA          | Vicksburg           | -90.91            | 32.31            | 1928–2018                |
| 15 | Nelson        | Canada       | Upstream of Bladder | -97.92            | 54.77            | 1915–2016                |
| 16 | Niger         | Nigeria      | Lokoja              | 6.77              | 7.80             | 1915–2012                |
| 17 | Ob'           | Russia       | Salekhard           | 66.60             | 66.63            | 1930–2015                |
| 18 | Orange        | South Africa | Violsdrift          | 17.63             | -28.78           | 1935–2018                |
| 19 | Ottawa        | Canada       | Chats Falls         | -76.23            | 45.47            | 1914–2018                |
| 20 | Paraná        | Argentina    | Timbues             | -60.71            | -32.67           | 1905–2018                |
| 21 | Parnaiba      | Brazil       | Porto Formo         | -42.37            | -3.46            | 1955–2018                |
| 22 | Pechora       | Russia       | Oksino              | 52.18             | 67.63            | 1916–2014                |
| 23 | Rhine         | Netherlands  | Lobith              | 6.11              | 51.85            | 1901–2017                |
| 24 | Saõ Francisco | Brazil       | Traipu              | -36.99            | -9.98            | 1926–2018                |

|    |                    |           |               |         |        |           |
|----|--------------------|-----------|---------------|---------|--------|-----------|
| 25 | Severnaya<br>Dvina | Russia    | Ust Pinega    | 41.92   | 64.13  | 1900–2014 |
| 26 | Saint<br>Lawrence  | Canada    | Cornwall ON   | -74.74  | 45.00  | 1900–2018 |
| 27 | Tocantins          | Brazil    | Tucurui       | -49.67  | -3.76  | 1955–2018 |
| 28 | Uruguay            | Argentina | Concordia     | -58.03  | -31.40 | 1942–2018 |
| 29 | Yangtze            | China     | Datong        | 117.62  | 30.77  | 1960–2016 |
| 30 | Yellow<br>River    | China     | Lijin         | 118.25  | 37.50  | 1960–2014 |
| 31 | Yenisei            | Russia    | Igarka        | 86.48   | 67.43  | 1936–2015 |
| 32 | Yukon              | USA       | Pilot Station | -162.88 | 61.93  | 1956–2018 |

370

371
